# Supplementary material for: Formulation Studies with Cyclodextrins for Novel Selenium NSAID Derivatives
Source: MDPI journal article supplement (doi:10.3390/ijms25031532), 2024-01-26
Supplement: s1 [file s1]

---

## Table of Contents

|                                                                                                                    |       |                        |
|--------------------------------------------------------------------------------------------------------------------|-------|------------------------|
| <b>Characterization – NMR spectra</b>                                                                              |       |                        |
| <b>Compound, compound + dimethyl sulfone, compound + <math>\beta</math>-CD, compound + <math>\gamma</math>-CDs</b> |       |                        |
| <b>Series I – Selenoesters</b>                                                                                     |       |                        |
| I.3e                                                                                                               | ..... | <b>Figures S1-S4</b>   |
| I.4a                                                                                                               | ..... | <b>Figures S5-S8</b>   |
| I.4b                                                                                                               | ..... | <b>Figures S9-S12</b>  |
| I.4d                                                                                                               | ..... | <b>Figures S13-S16</b> |
| I.4e                                                                                                               | ..... | <b>Figures S17-S20</b> |
| <b>Series II – Diacyl Diselenides</b>                                                                              |       |                        |
| II.1                                                                                                               | ..... | <b>Figures S21-S24</b> |
| II.2                                                                                                               | ..... | <b>Figures S25-S28</b> |
| II.3                                                                                                               | ..... | <b>Figures S29-S32</b> |
| II.4                                                                                                               | ..... | <b>Figures S33-S36</b> |
| II.5                                                                                                               | ..... | <b>Figures S37-S40</b> |
| <b>Complex II.5:<math>\beta</math>-CD</b>                                                                          |       |                        |
| <b><math>^1\text{H}</math>-NMR spectra of molar fractions</b>                                                      | ..... | <b>Figure S41</b>      |
| <b>Computational data</b>                                                                                          |       |                        |
| <b>Docking score data</b>                                                                                          | ..... | <b>Tables S1-S2</b>    |
| <b>Energy of the selected compounds</b>                                                                            | ..... | <b>Table S3</b>        |

## Characterization – NMR spectra

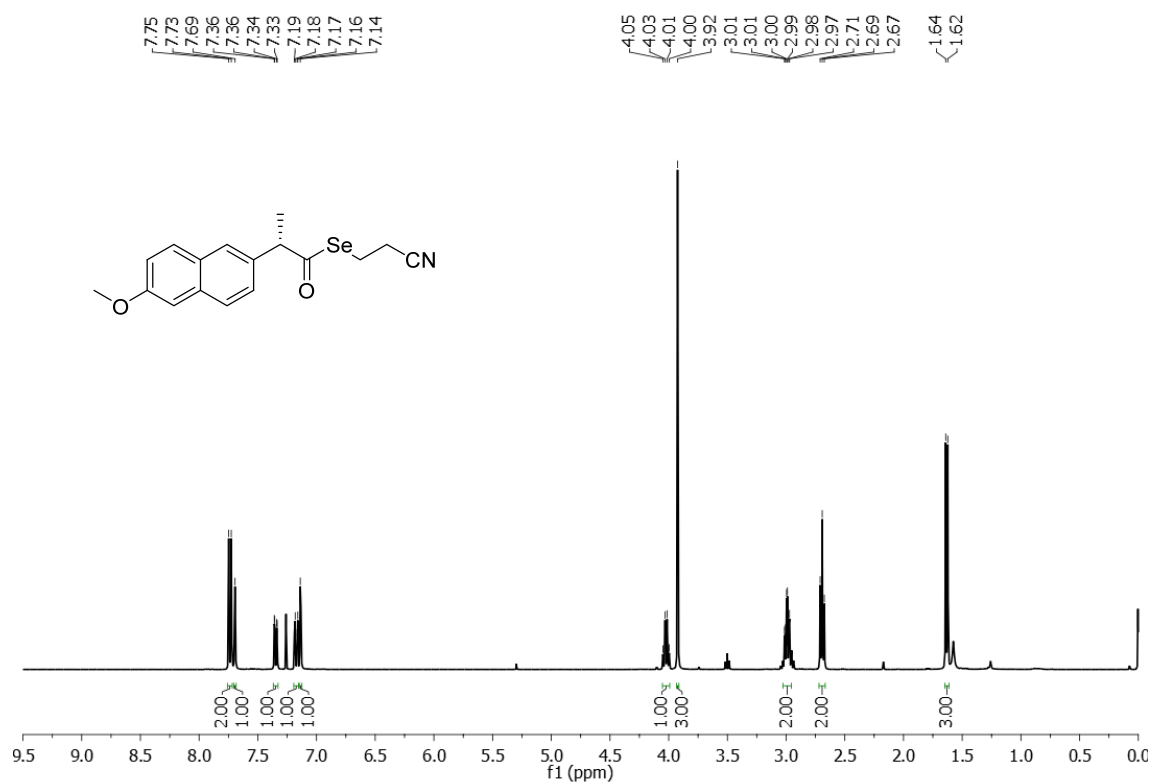

**Figure S1.** <sup>1</sup>H-NMR spectrum of compound **1.3e**.

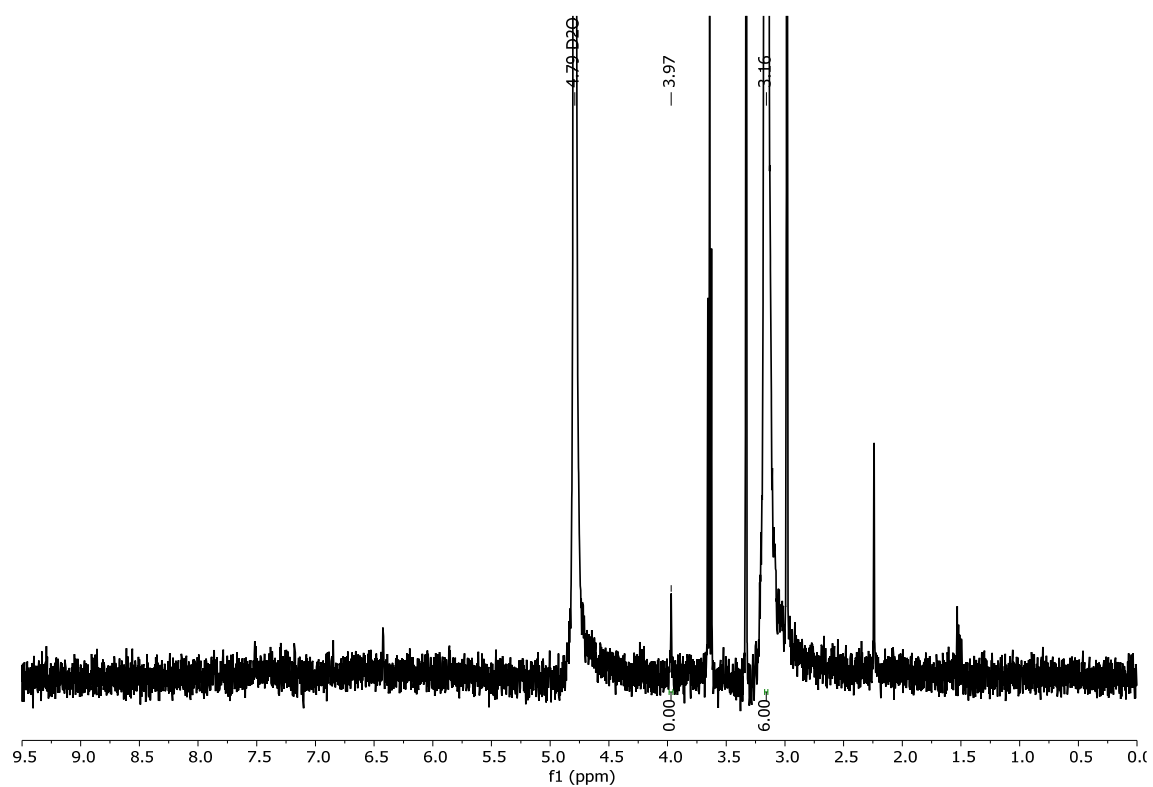

**Figure S2.** <sup>1</sup>H-NMR spectrum of compound **1.3e** and dimethyl sulfone.

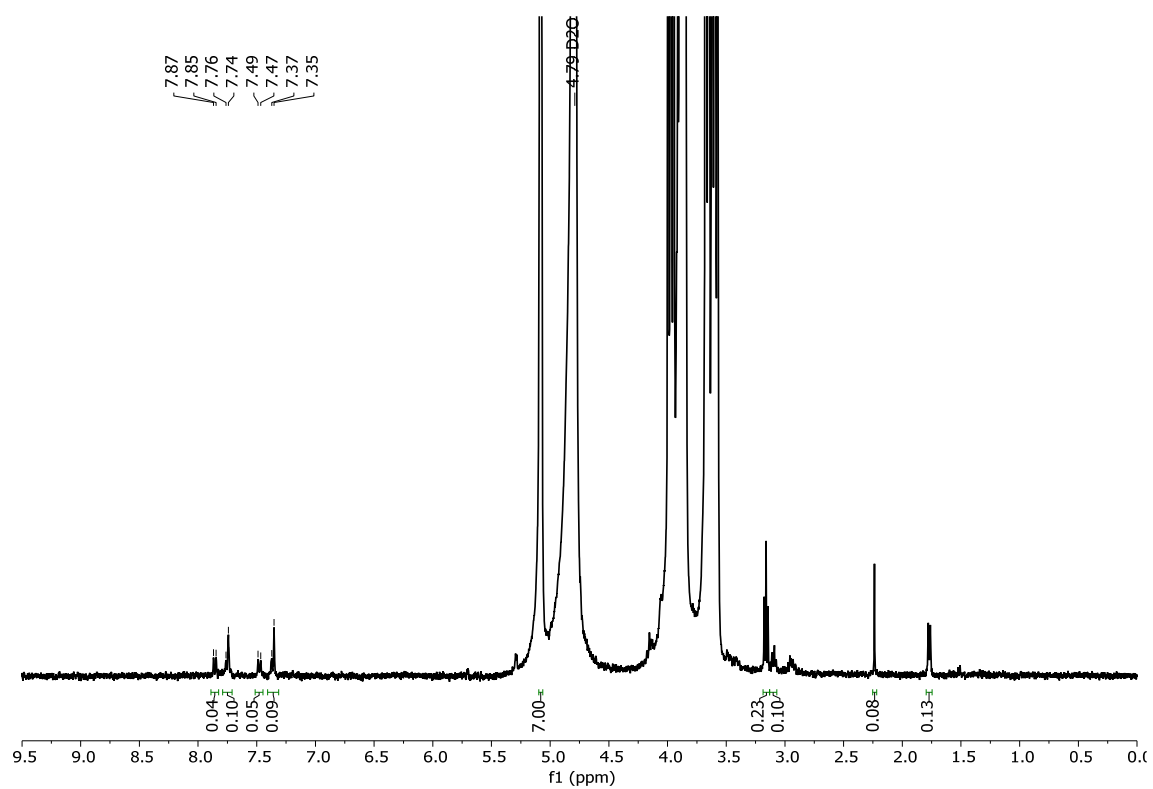

**Figure S3.** <sup>1</sup>H-NMR spectrum of compound **1.3e** and  $\beta$ -CD.

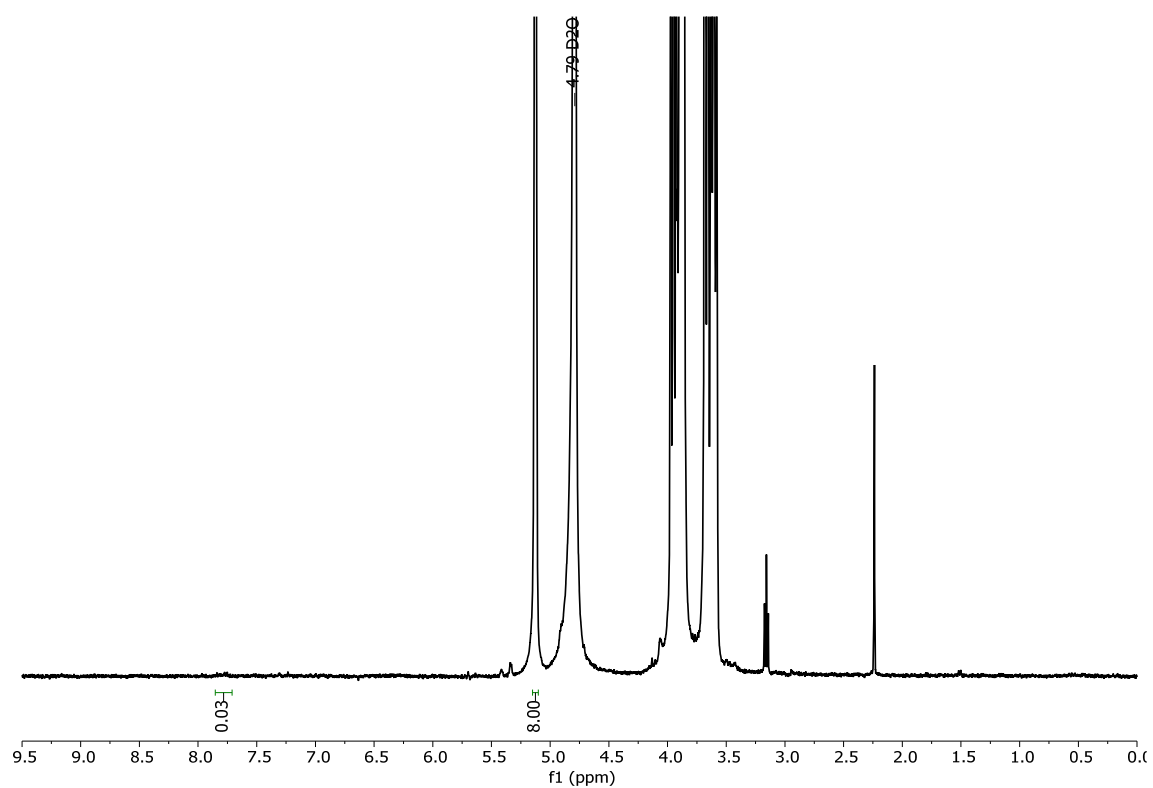

**Figure S4.** <sup>1</sup>H-NMR spectrum of compound **1.3e** and  $\gamma$ -CD.

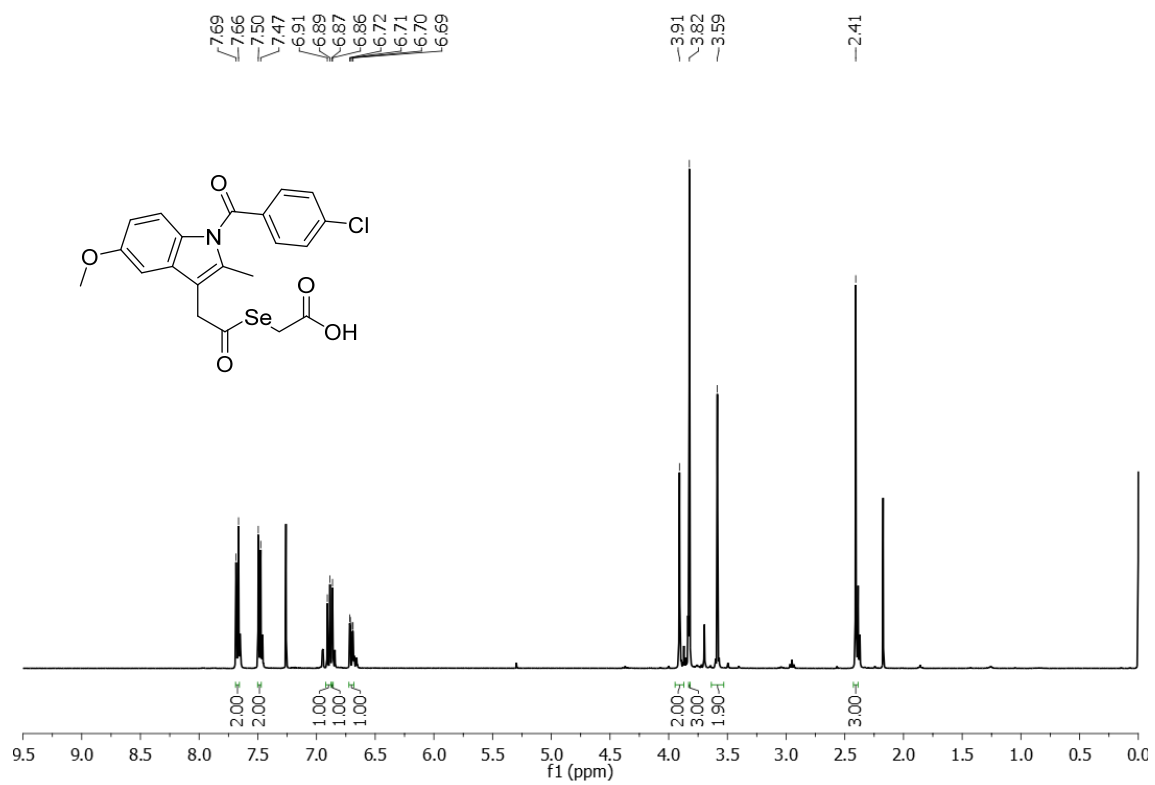

**Figure S5.** <sup>1</sup>H-NMR spectrum of compound **1.4a**.

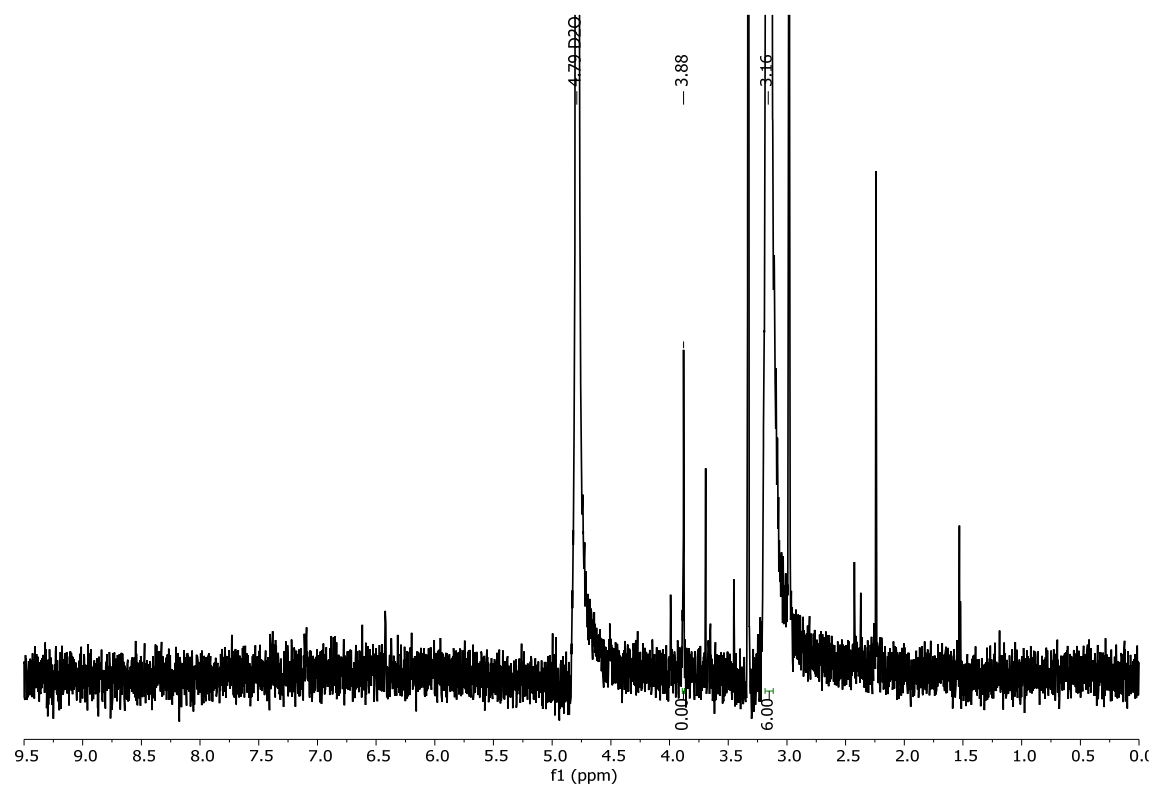

**Figure S6.** <sup>1</sup>H-NMR spectrum of compound **1.4a** and dimethyl sulfone.

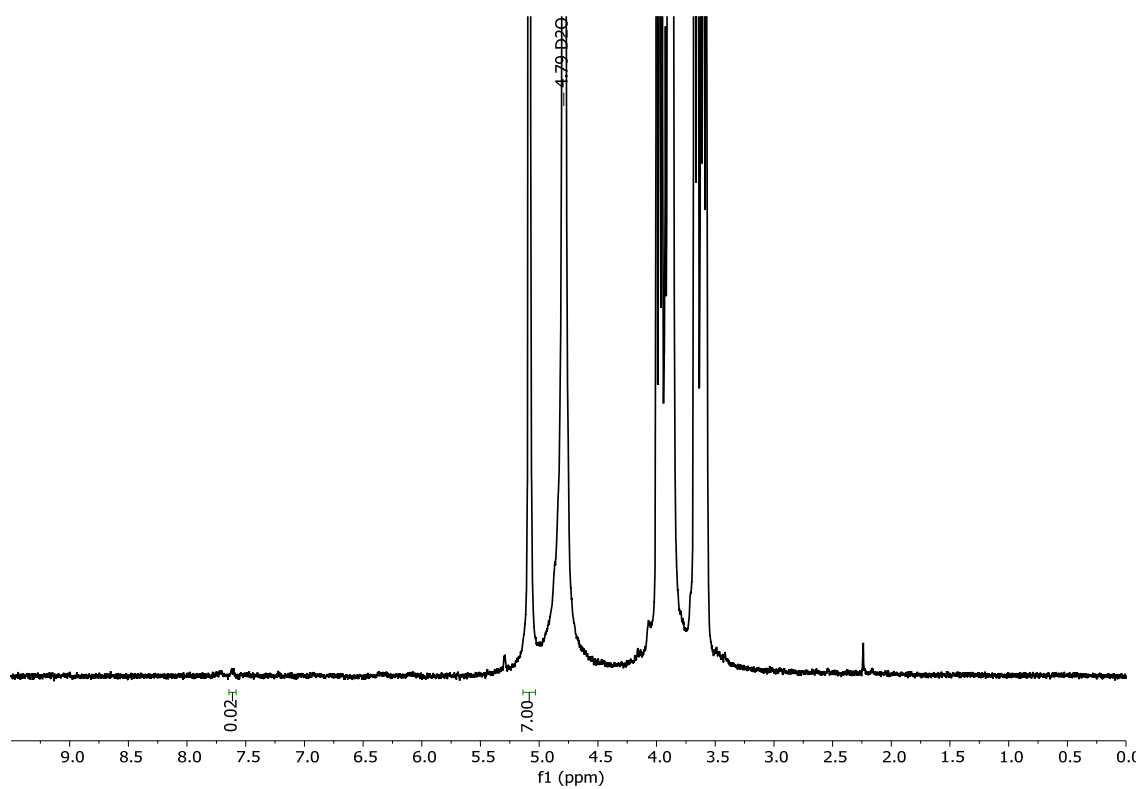

**Figure S7.**  $^1\text{H}$ -NMR spectrum of compound **1.4a** and  $\beta$ -CD.

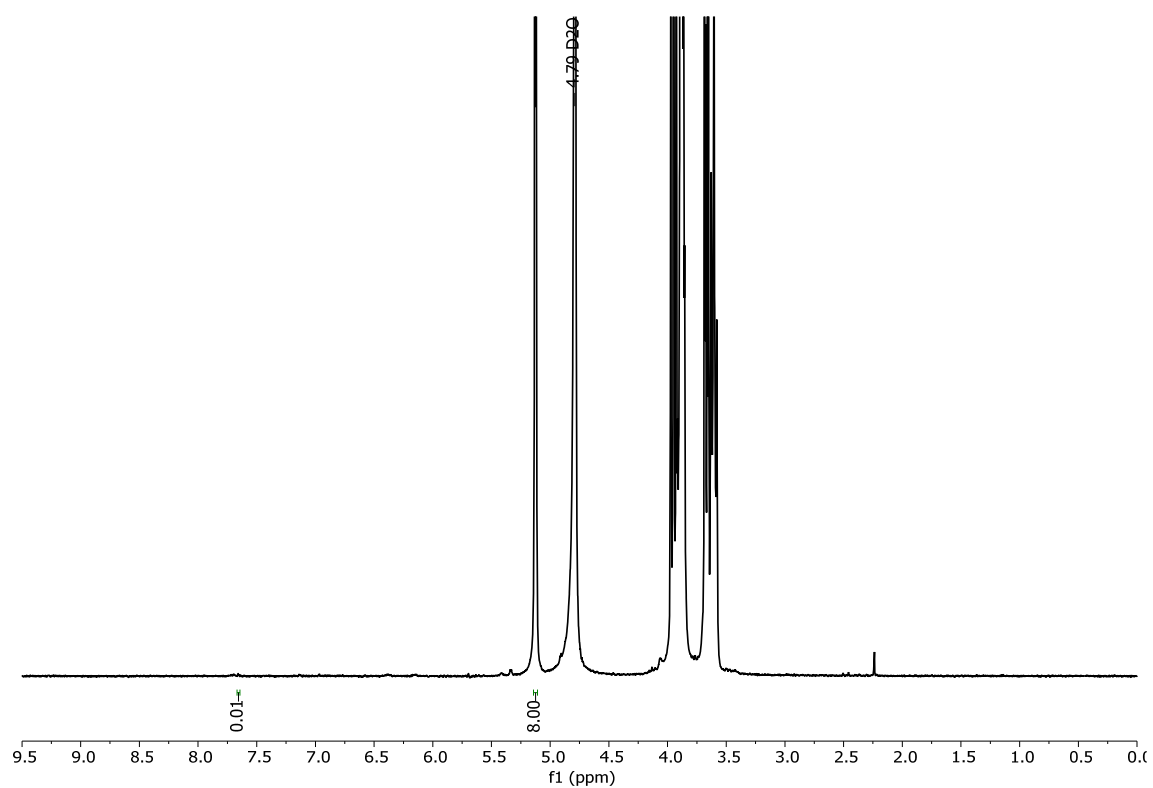

**Figure S8.**  $^1\text{H}$ -NMR spectrum of compound **1.4a** and  $\gamma$ -CD.

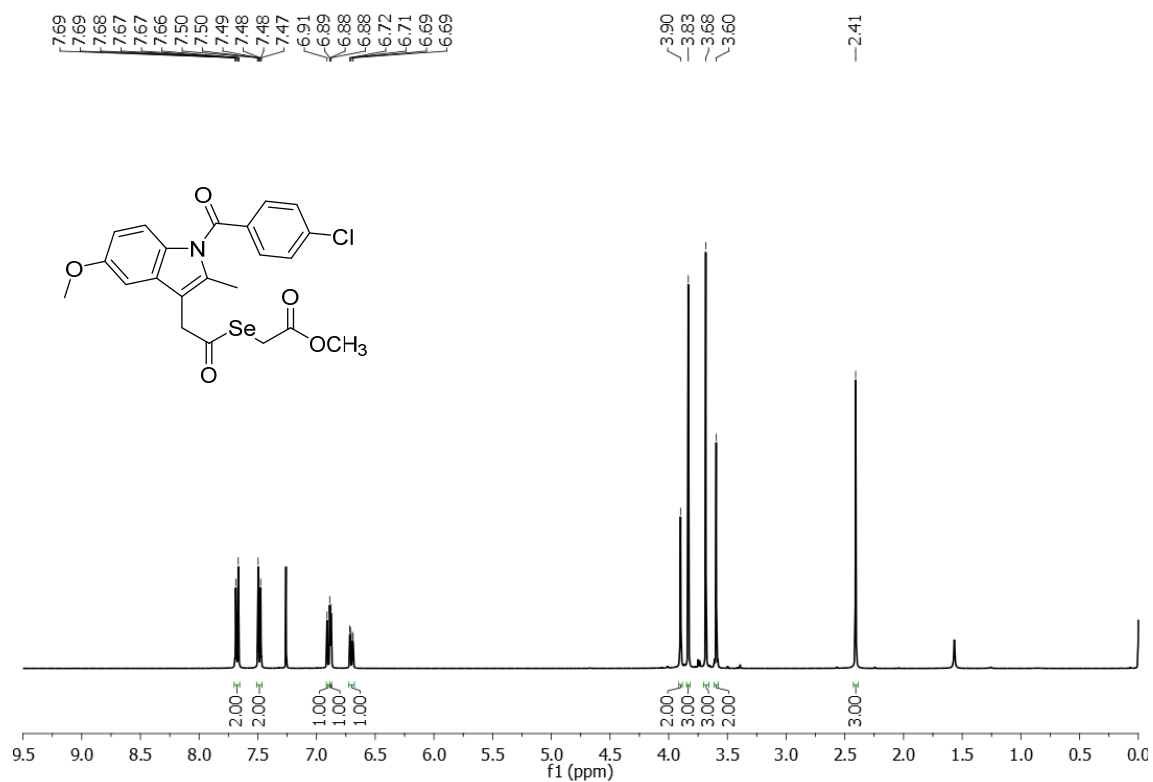

**Figure S9.** <sup>1</sup>H-NMR spectrum of compound **1.4b**.

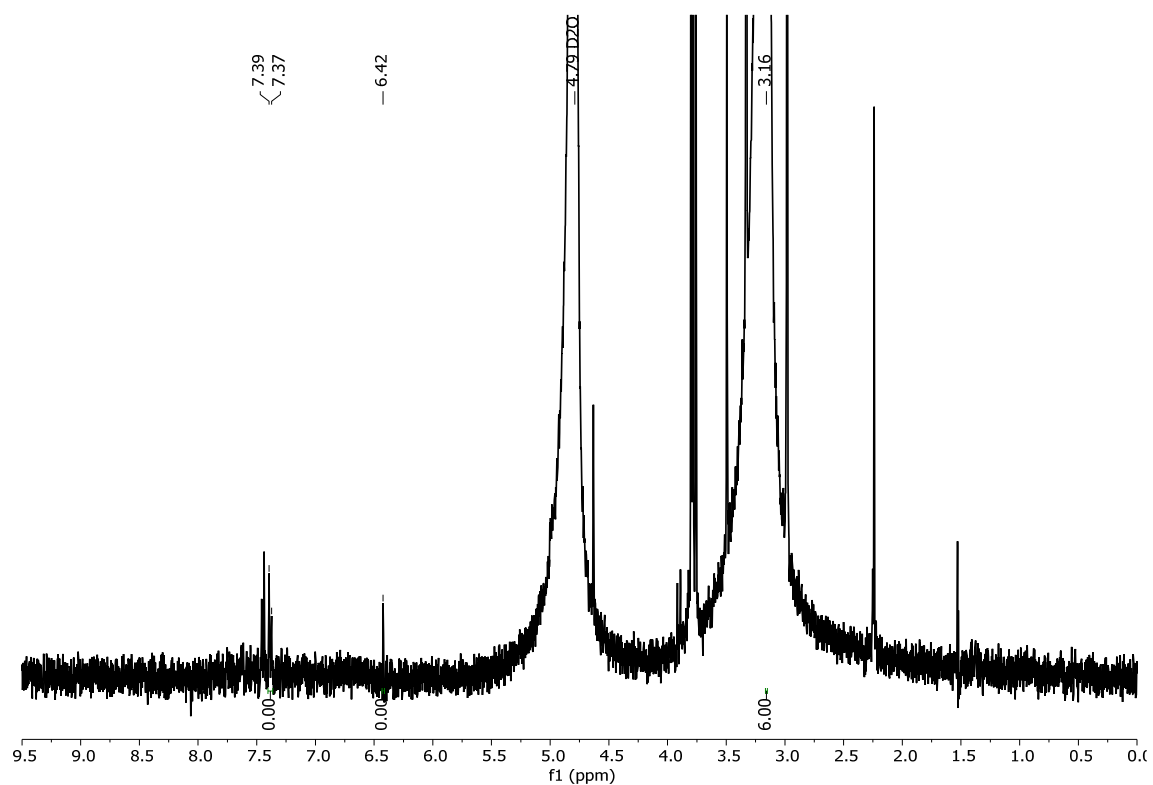

**Figure S10.** <sup>1</sup>H-NMR spectrum of compound **1.4b** and dimethyl sulfone.

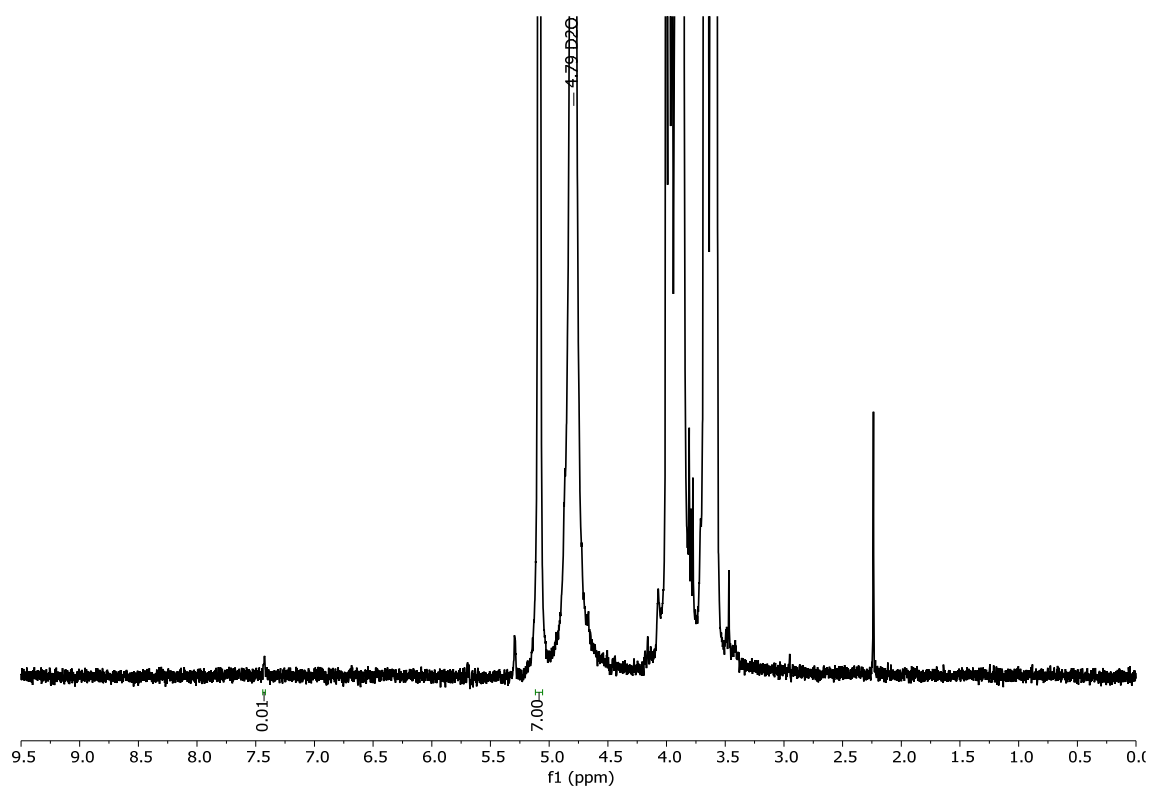

**Figure S11.** <sup>1</sup>H-NMR spectrum of compound **1.4b** and β-CD.

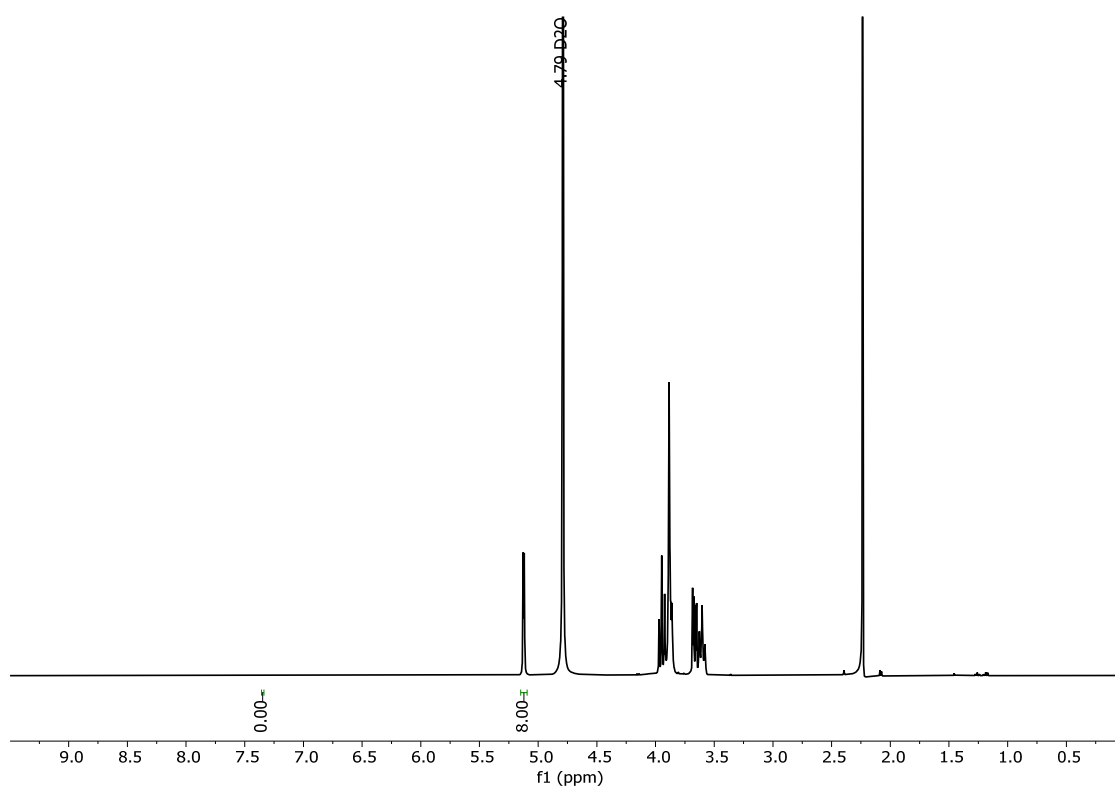

**Figure S12.** <sup>1</sup>H-NMR spectrum of compound **1.4b** and γ-CD.

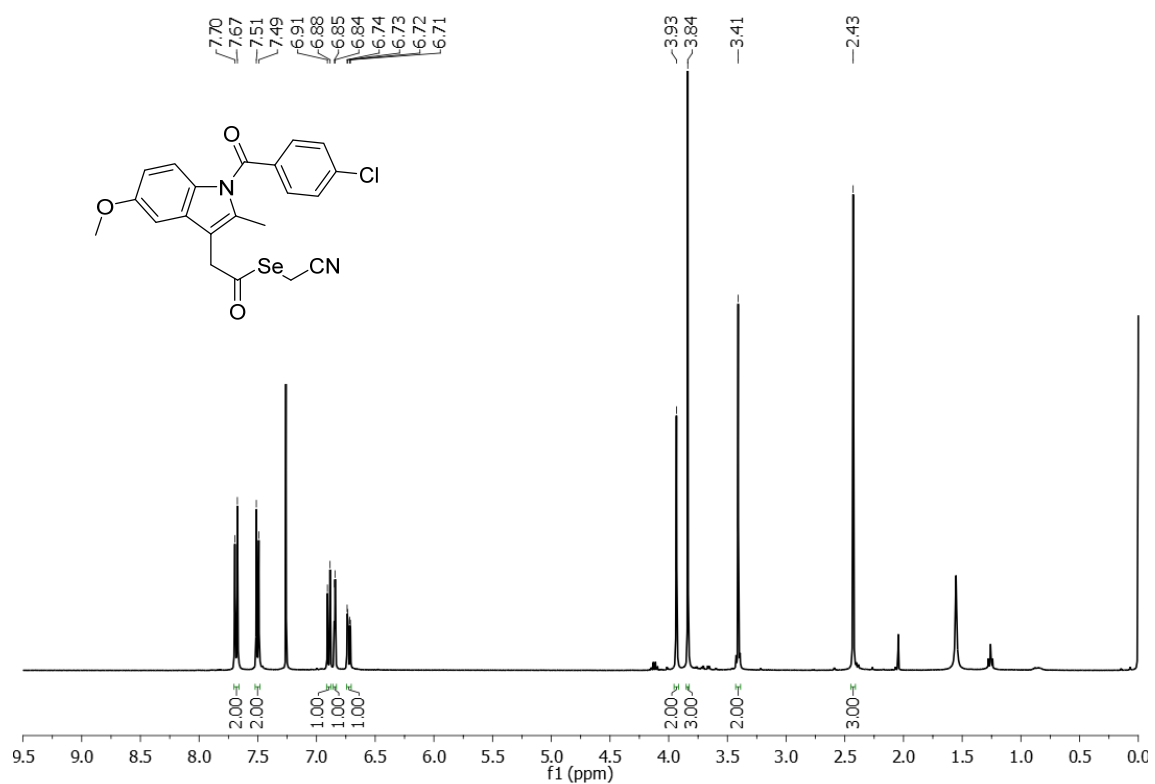

**Figure S13.** <sup>1</sup>H-NMR spectrum of compound **1.4d**.

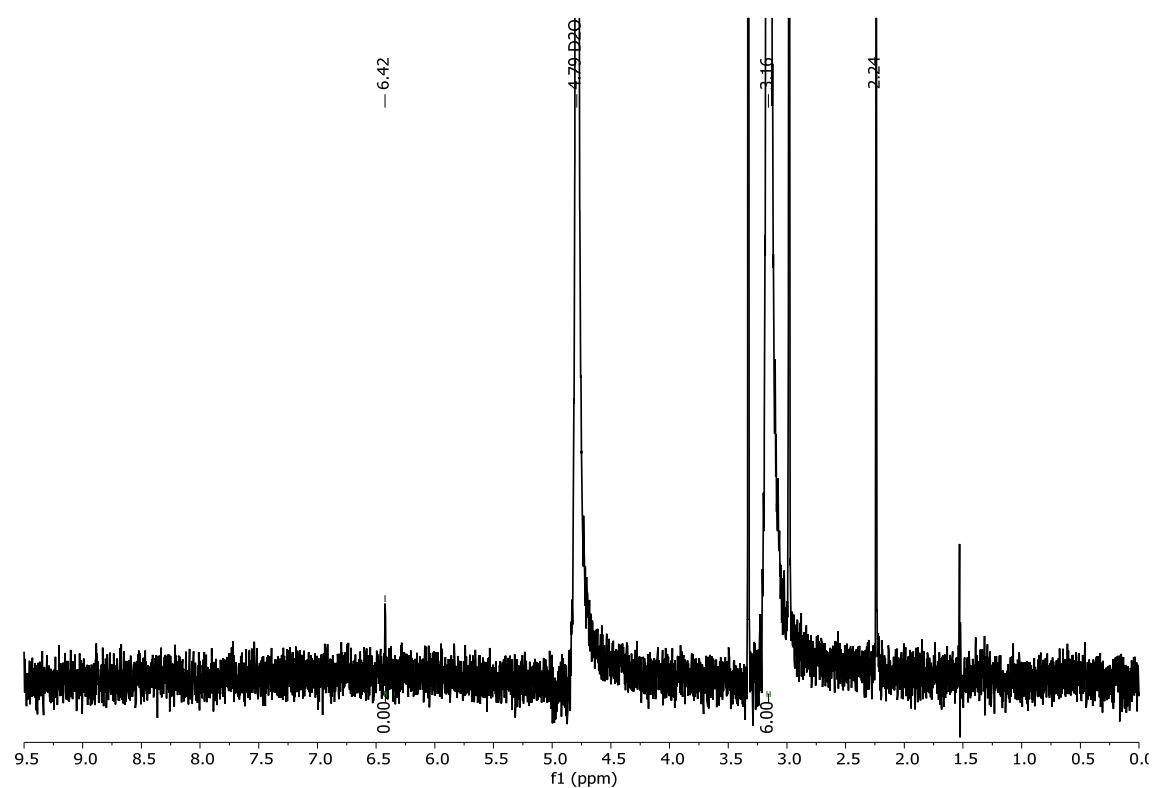

**Figure S14.** <sup>1</sup>H-NMR spectrum of compound **1.4d** and dimethyl sulfone.



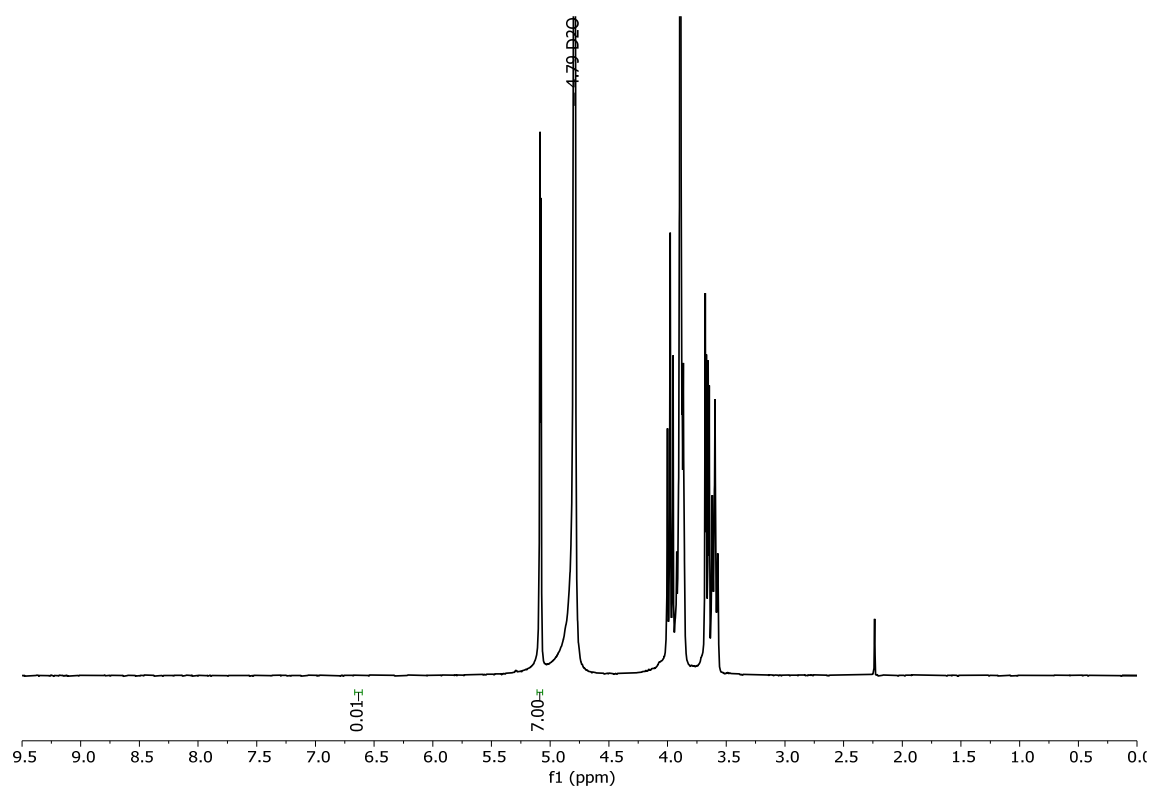

**Figure S15.**  $^1\text{H}$ -NMR spectrum of compound **1.4d** and  $\beta$ -CD.

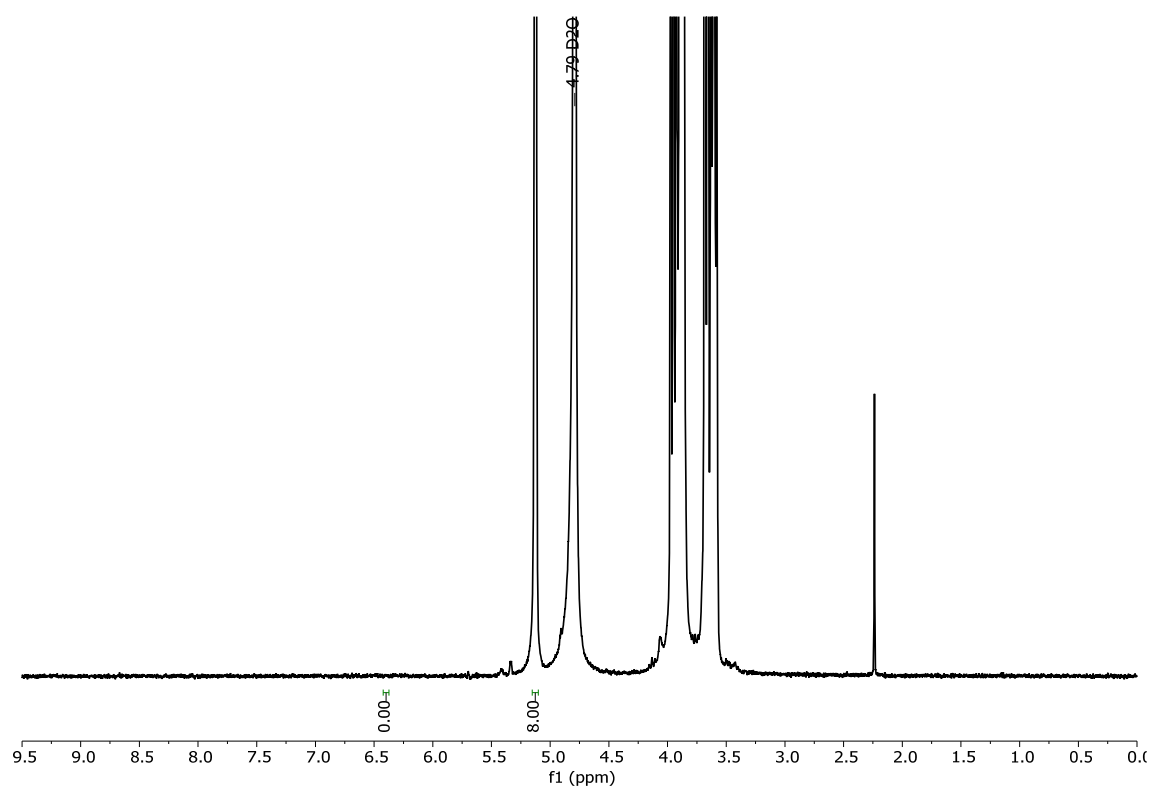

**Figure S16.**  $^1\text{H}$ -NMR spectrum of compound **1.4d** and  $\gamma$ -CD.

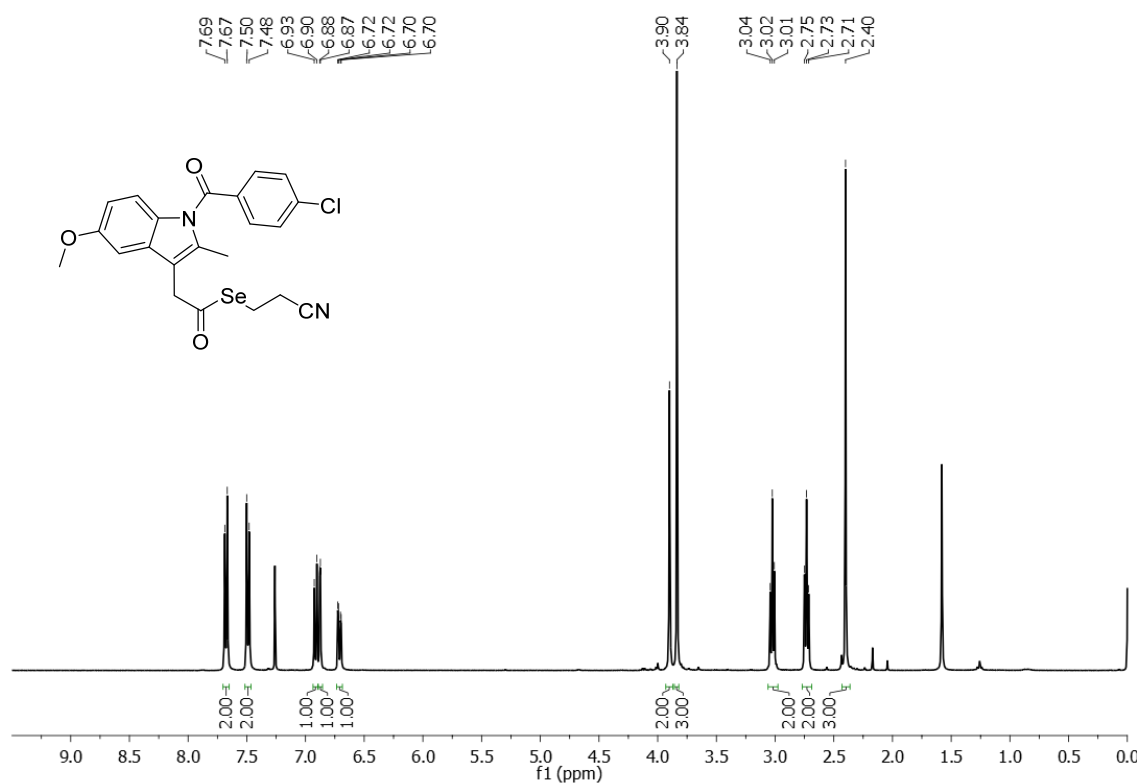

**Figure S17.** <sup>1</sup>H-NMR spectrum of compound **1.4e**.

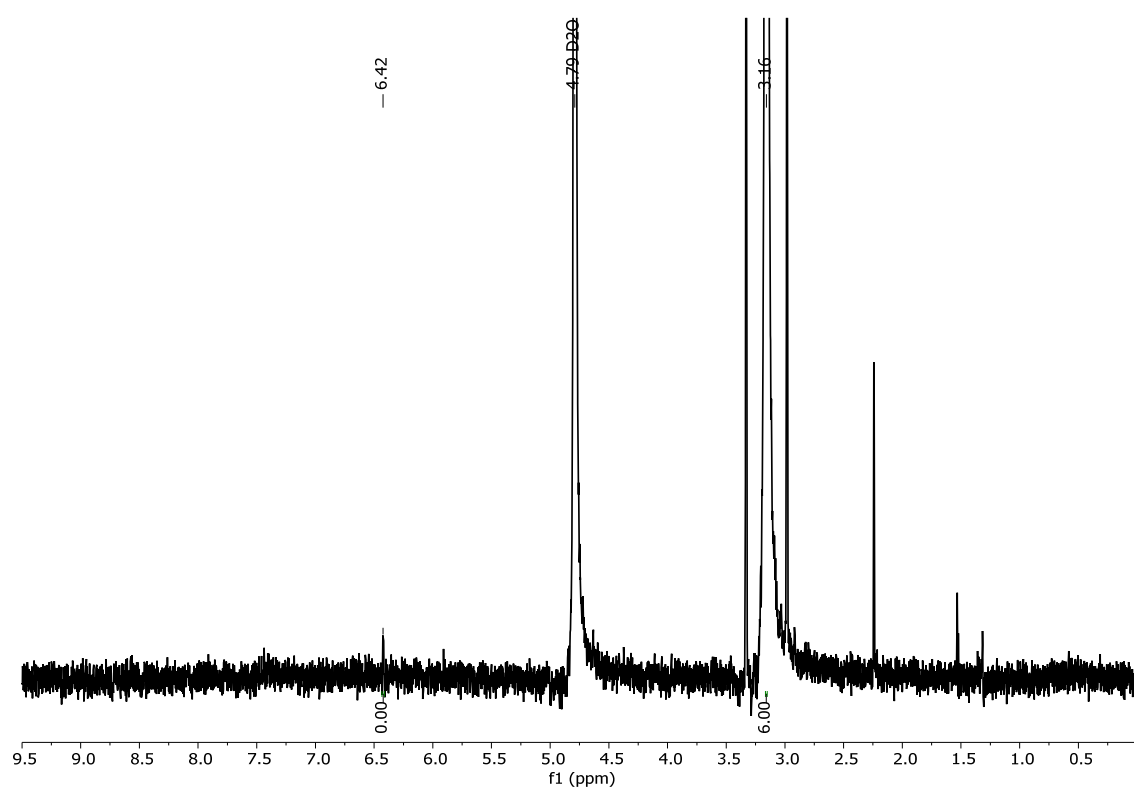

**Figure S18.** <sup>1</sup>H-NMR spectrum of compound **1.4e** and dimethyl sulfone.

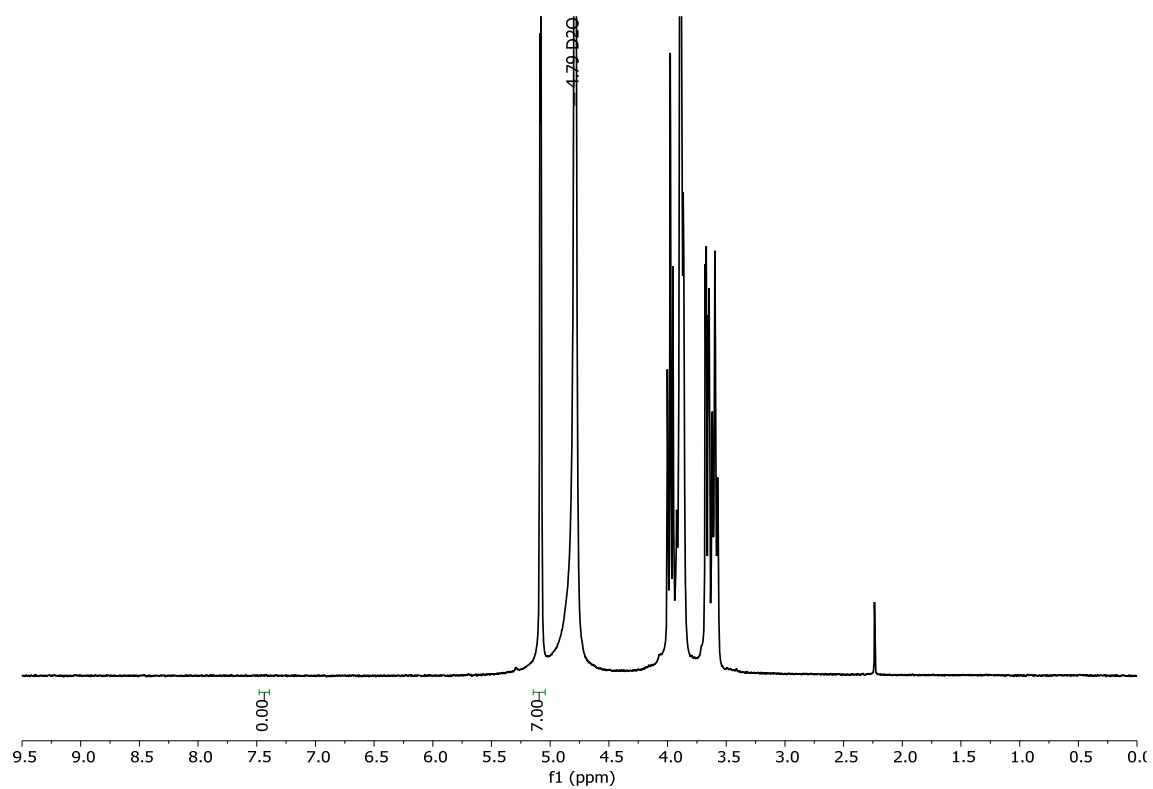

**Figure S19.** <sup>1</sup>H-NMR spectrum of compound **1.4e** and  $\beta$ -CD.

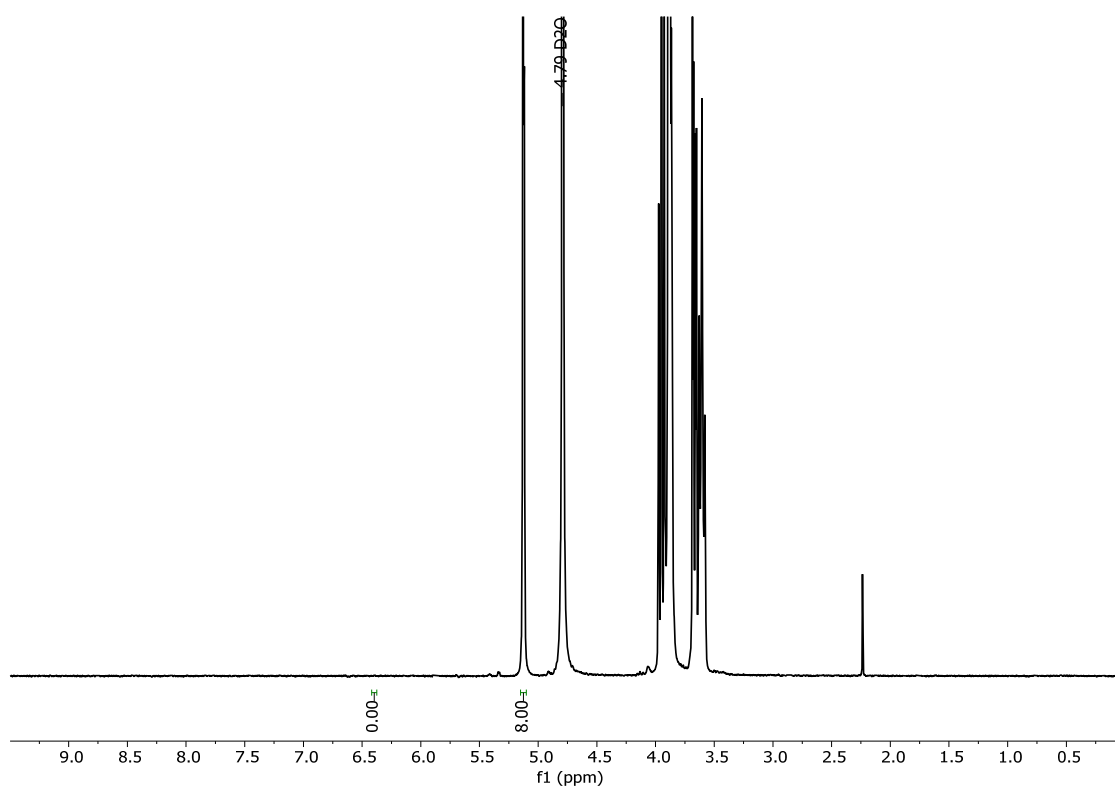

**Figure S20.** <sup>1</sup>H-NMR spectrum of compound **1.4e** and  $\gamma$ -CD.

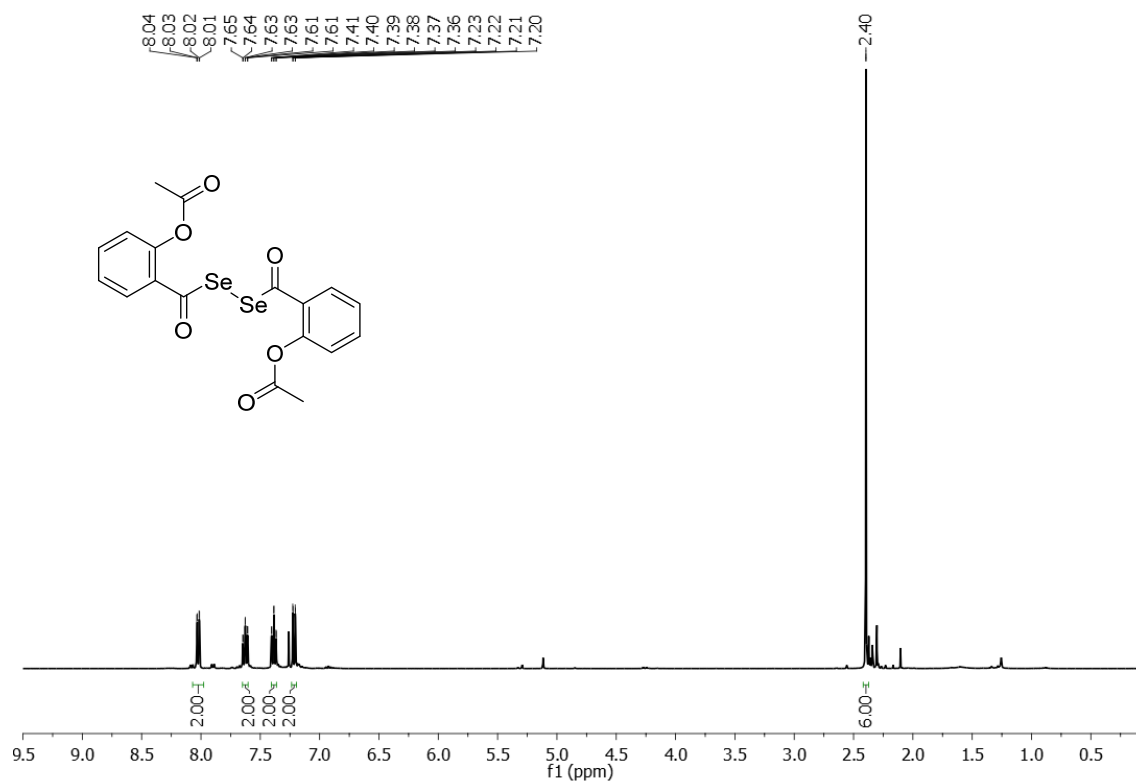

**Figure S21.** <sup>1</sup>H-NMR spectrum of compound II.1.

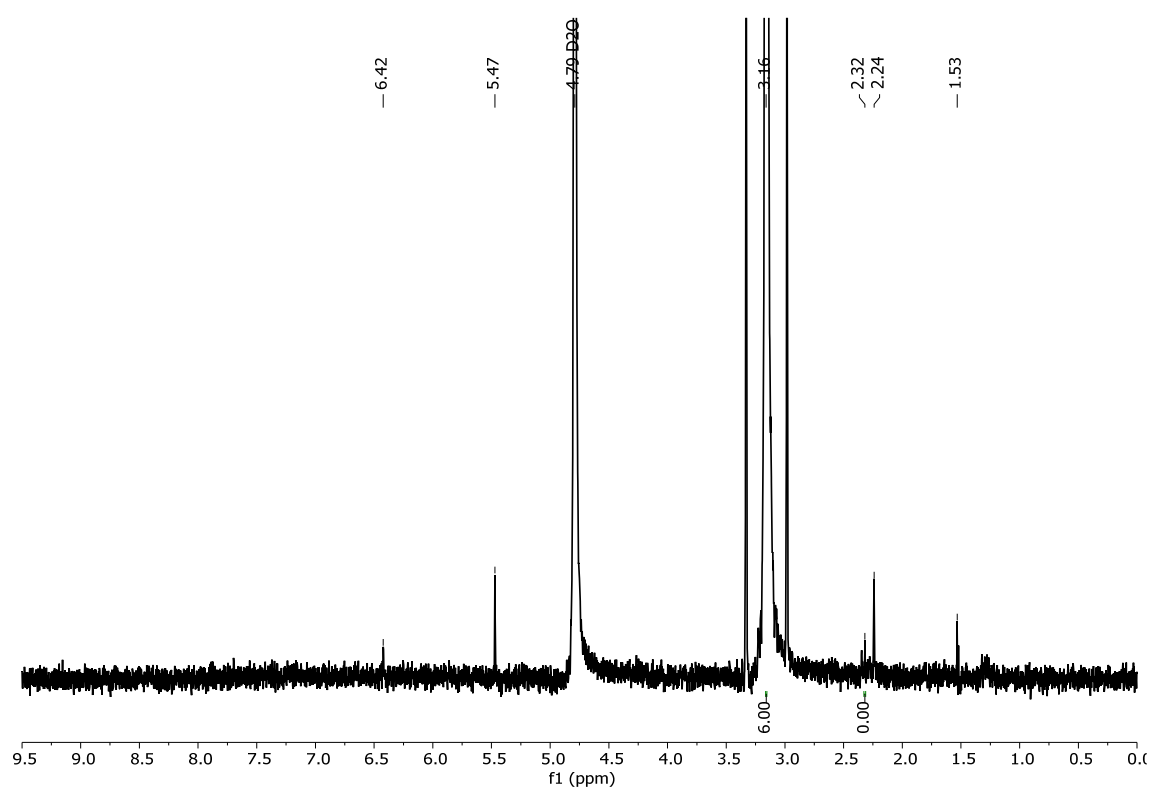

**Figure S22.** <sup>1</sup>H-NMR spectrum of compound II.1 and dimethyl sulfoxide.

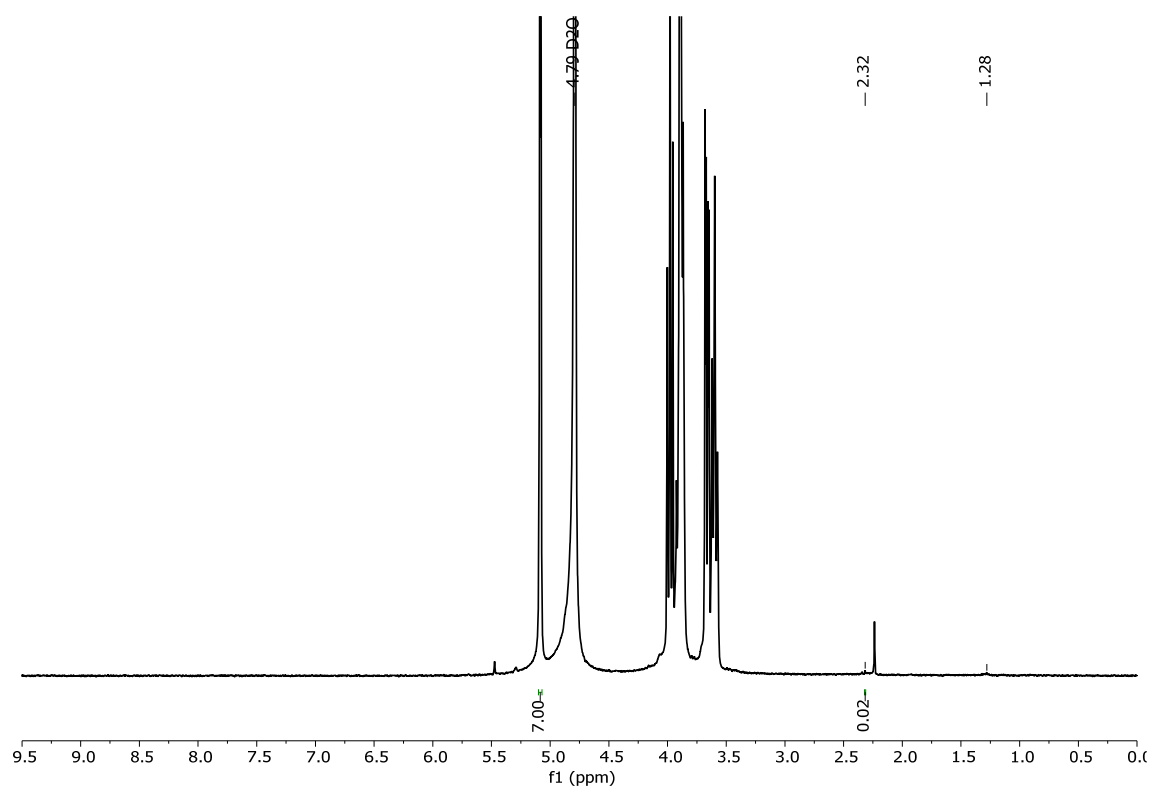

**Figure S23.** <sup>1</sup>H-NMR spectrum of compound II.1 and β-CD.

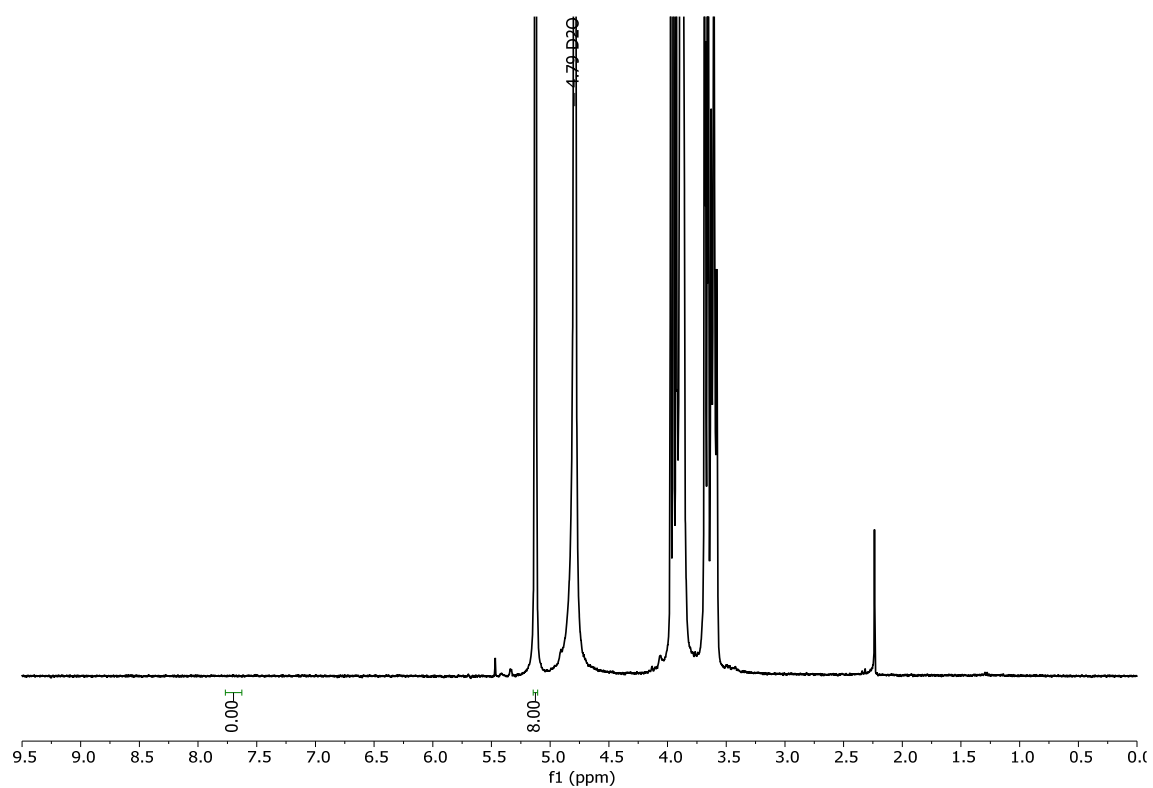

**Figure S24.** <sup>1</sup>H-NMR spectrum of compound II.1 and γ-CD.

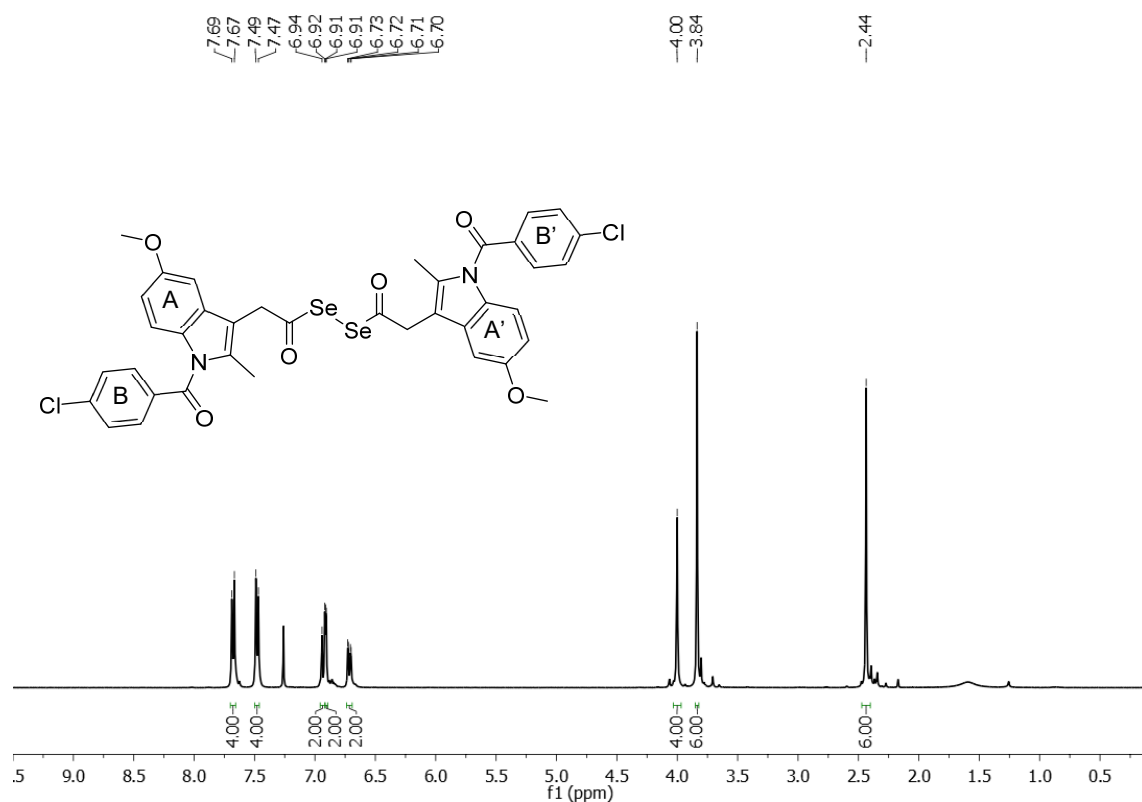

Figure S25.  $^1\text{H}$ -NMR spectrum of compound II.2.

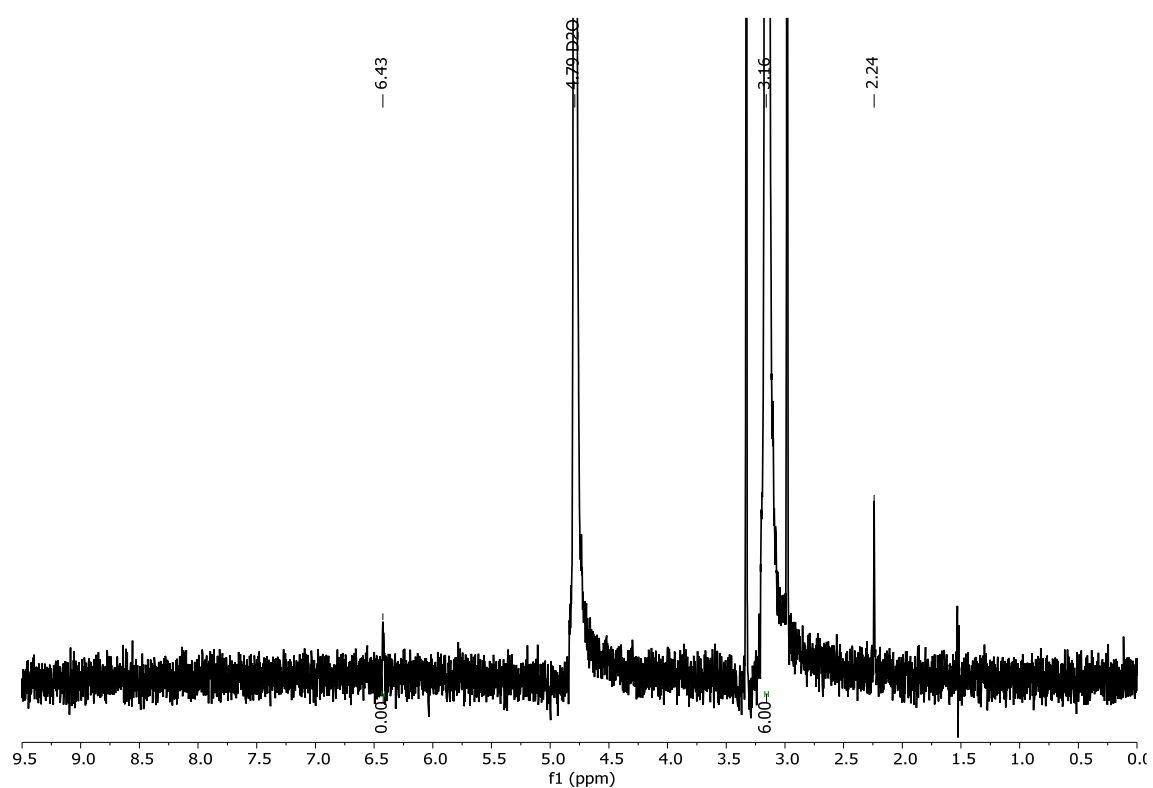

Figure S26.  $^1\text{H}$ -NMR spectrum of compound II.2 and dimethyl sulfone.

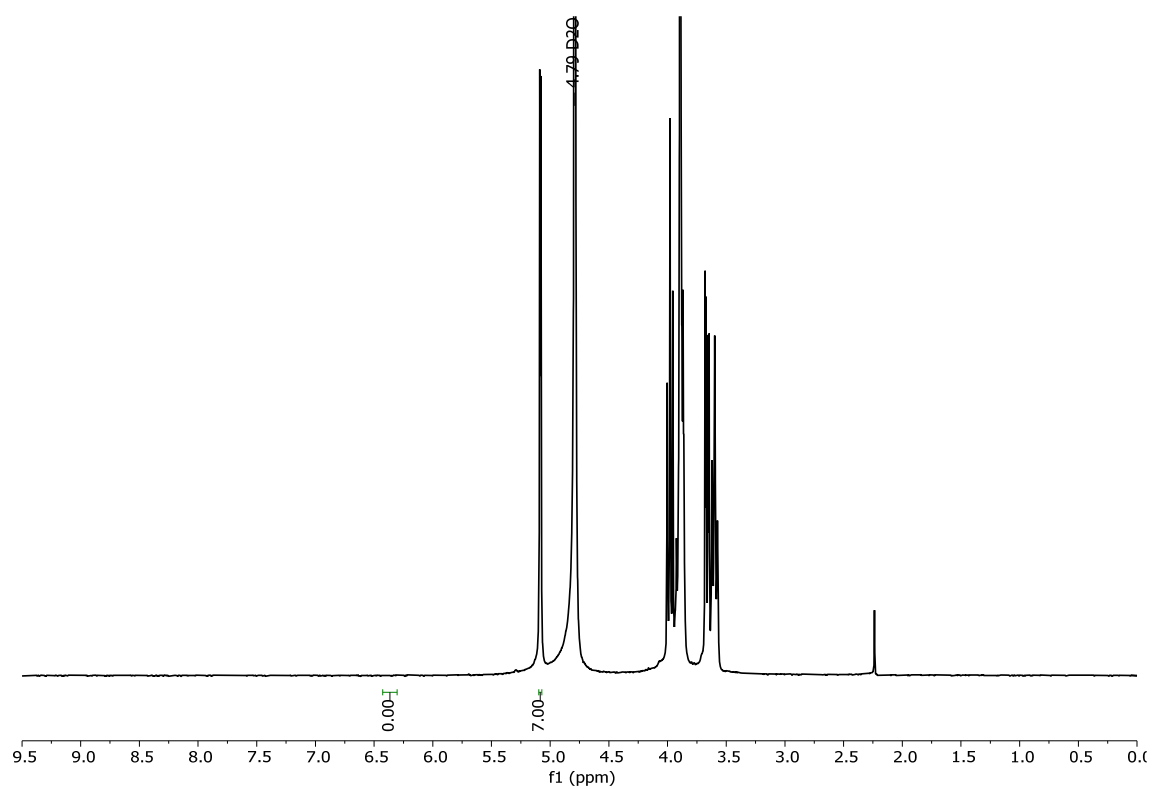

**Figure S27.**  $^1\text{H}$ -NMR spectrum of compound **II.2** and  $\beta$ -CD.

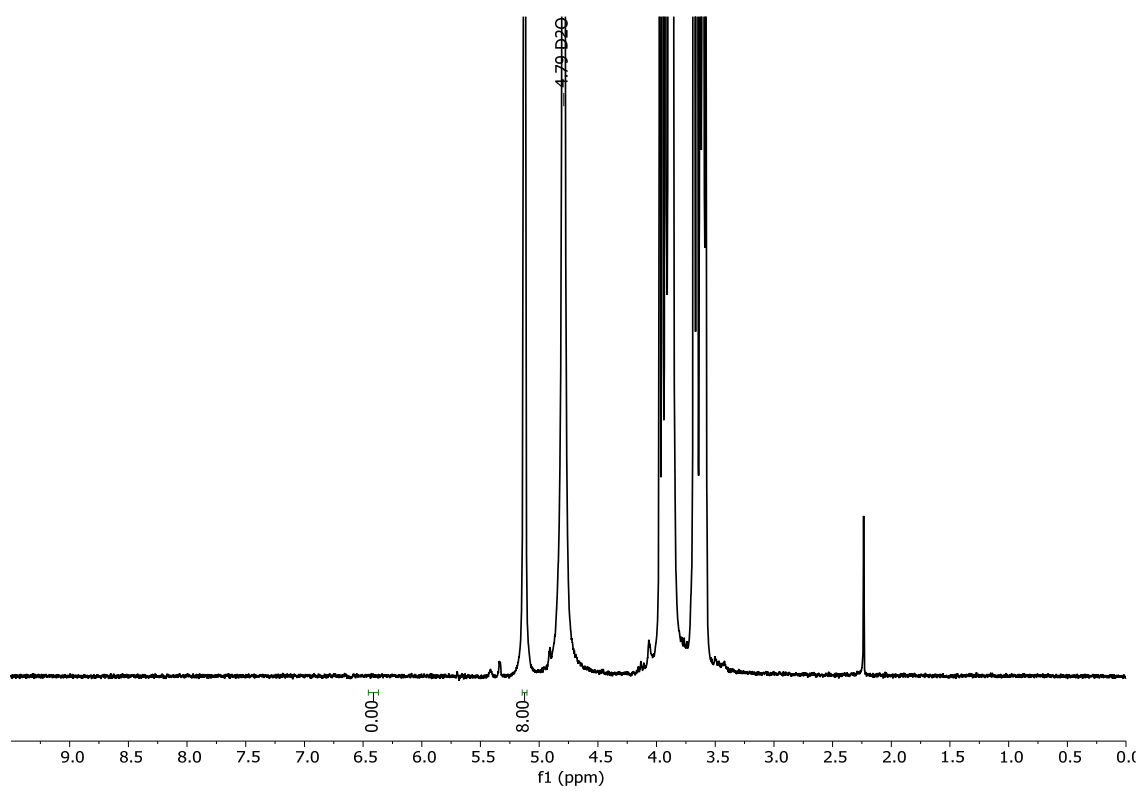

**Figure S28.**  $^1\text{H}$ -NMR spectrum of compound **II.2** and  $\gamma$ -CD.

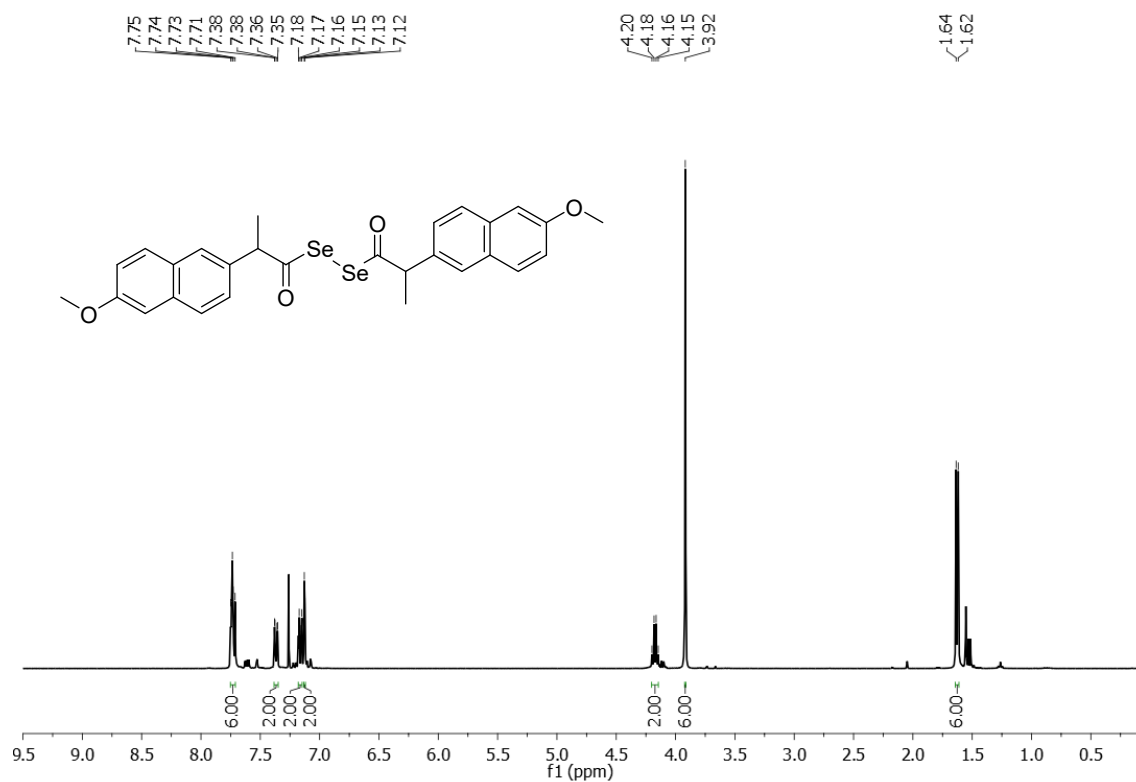

Figure S29. <sup>1</sup>H-NMR spectrum of compound II.3.

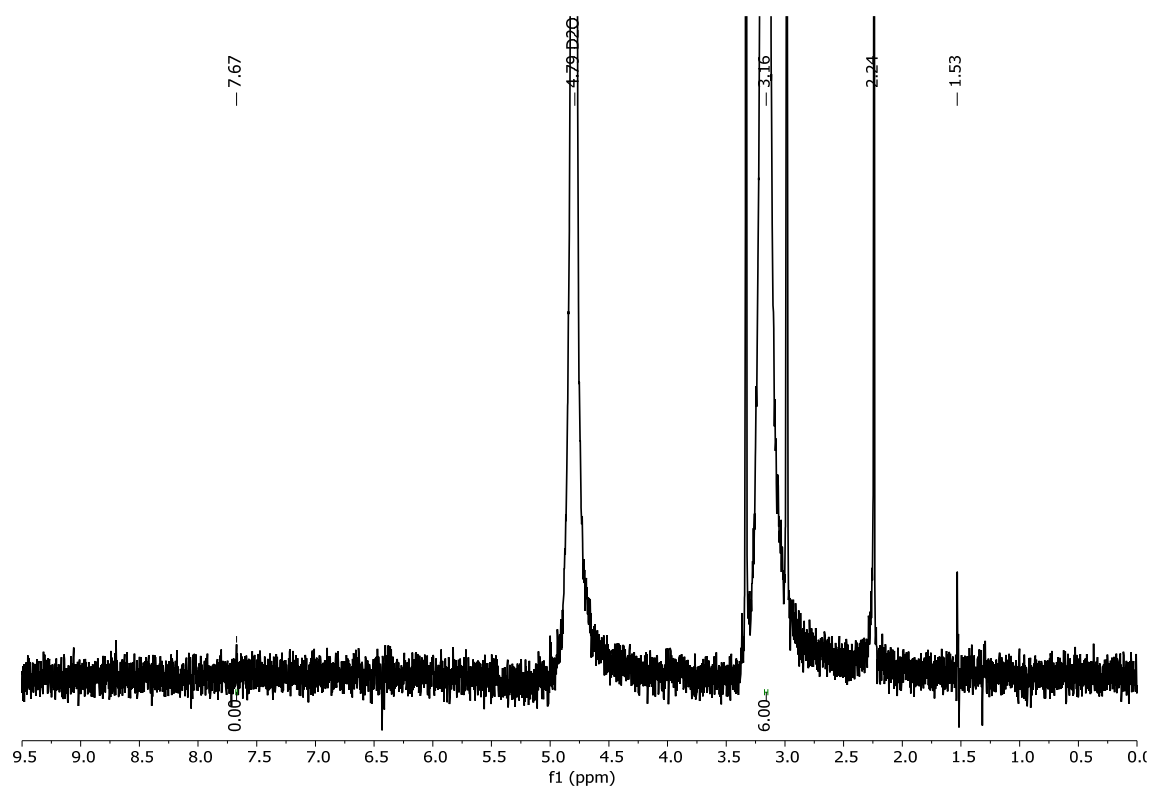

Figure S30. <sup>1</sup>H-NMR spectrum of compound II.3 and dimethyl sulfoxide.



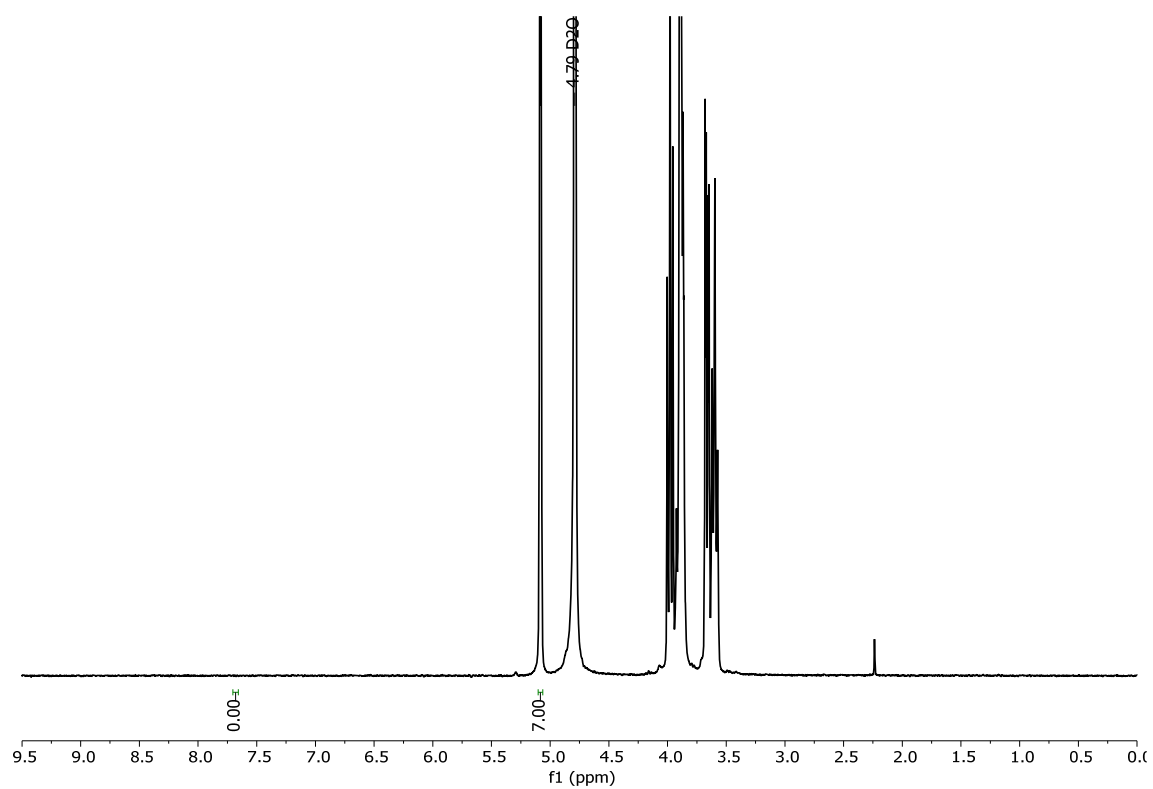

**Figure S31.** <sup>1</sup>H-NMR spectrum of compound II.3 and β-CD.

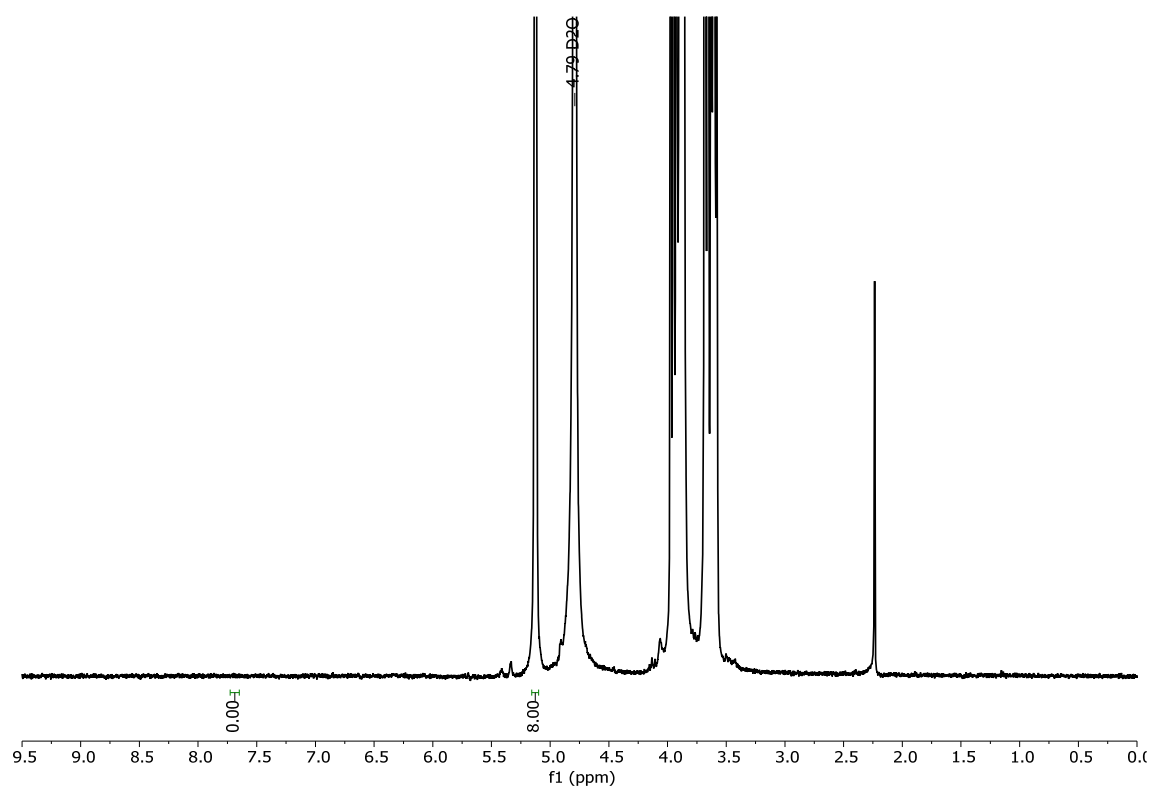

**Figure S32.** <sup>1</sup>H-NMR spectrum of compound II.3 and γ-CD.

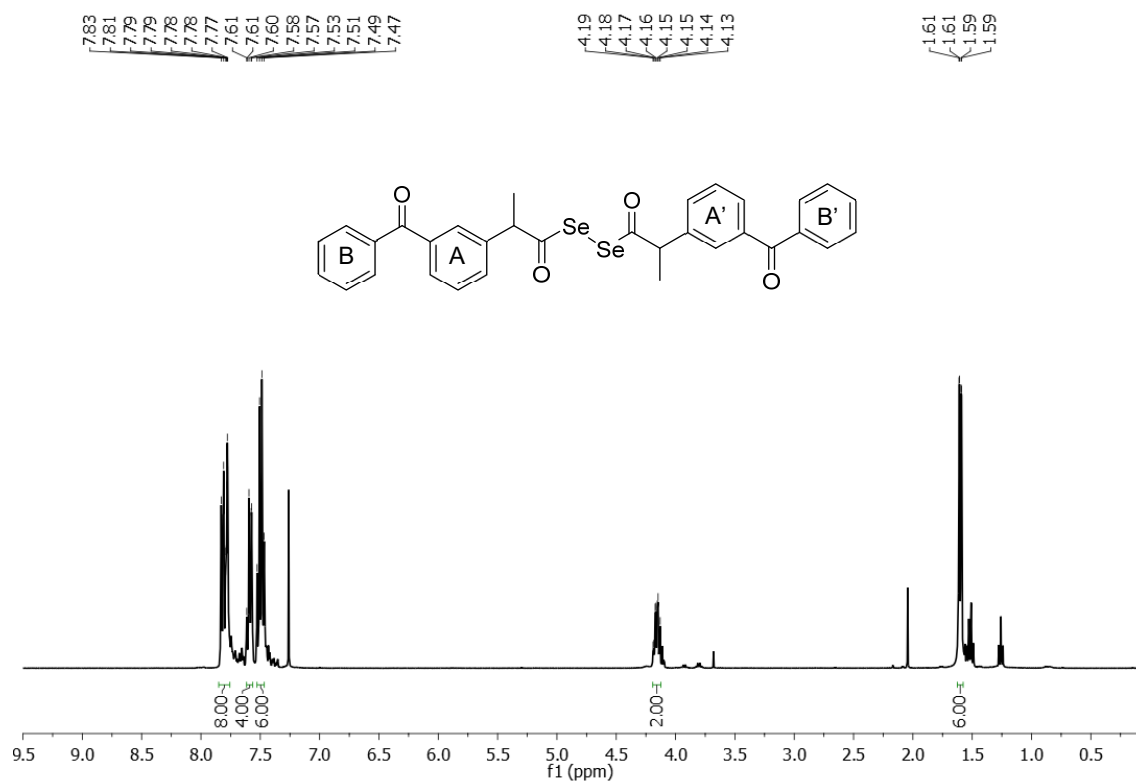

**Figure S33.**  $^1\text{H-NMR}$  spectrum of compound II.4.

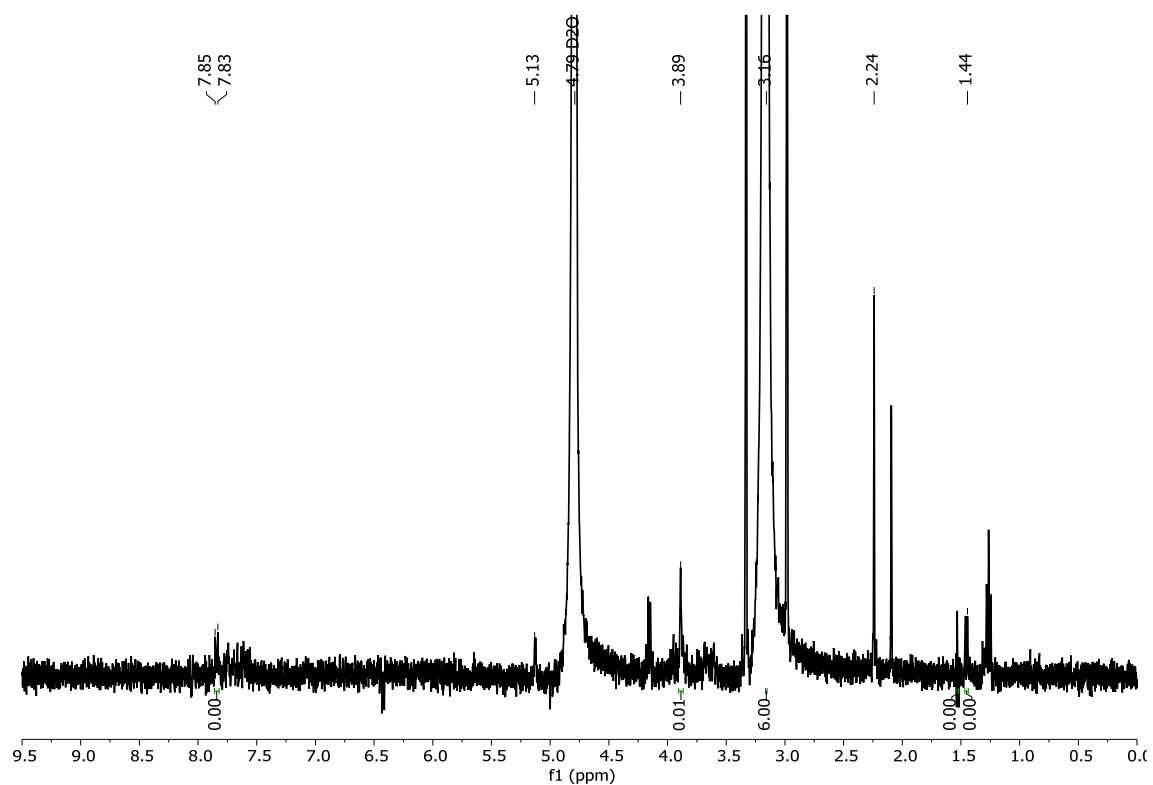

**Figure S34.**  $^1\text{H-NMR}$  spectrum of compound II.4 and dimethyl sulfone.

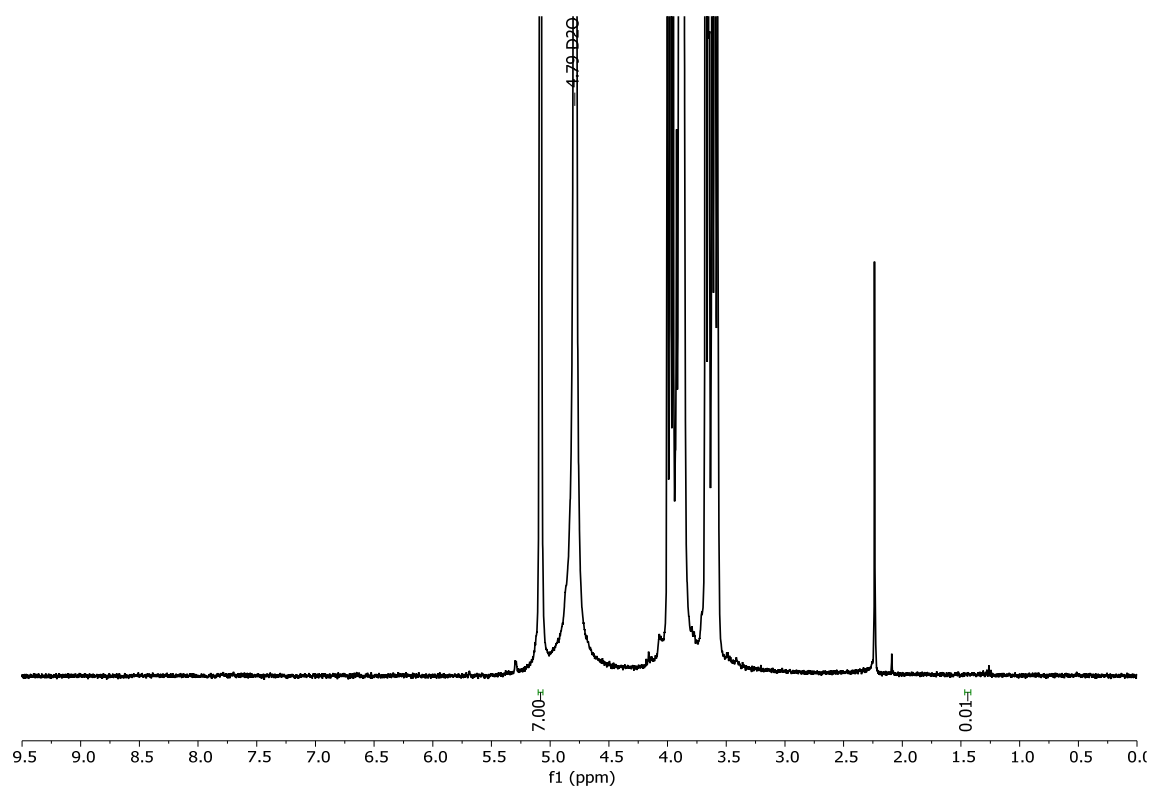

**Figure S35.**  $^1\text{H}$ -NMR spectrum of compound **II.4** and  $\beta$ -CD.

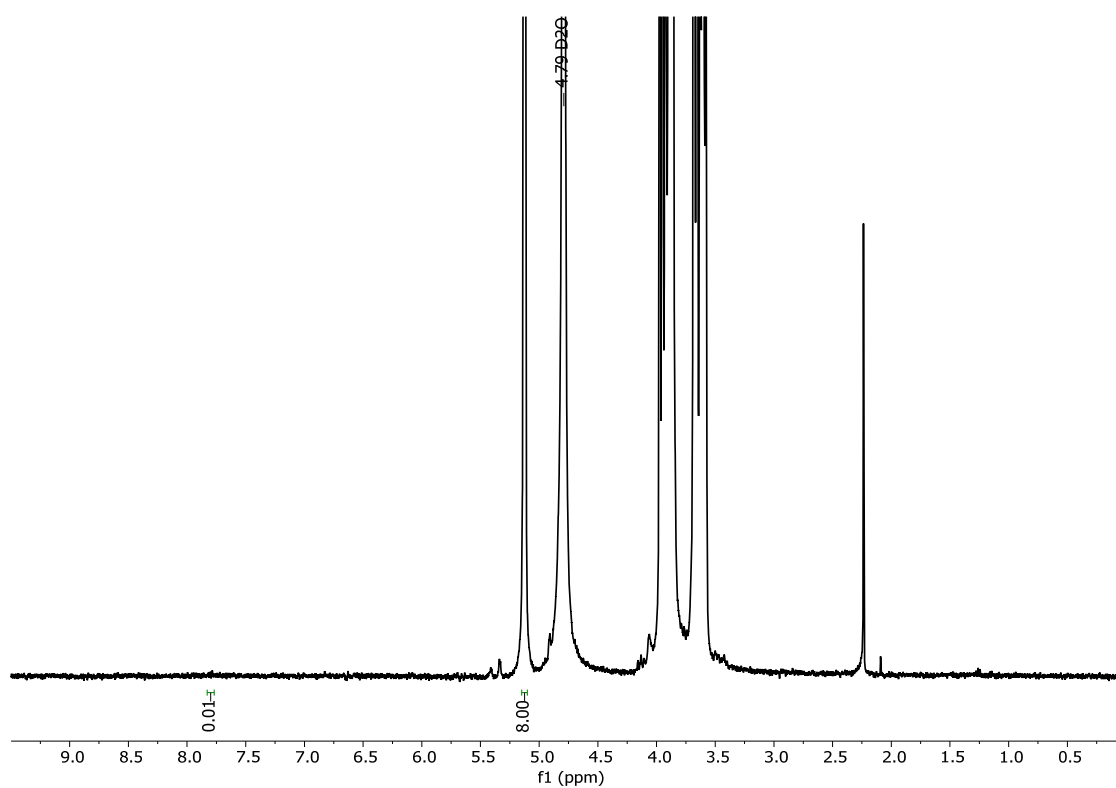

**Figure S36.**  $^1\text{H}$ -NMR spectrum of compound **II.4** and  $\gamma$ -CD.

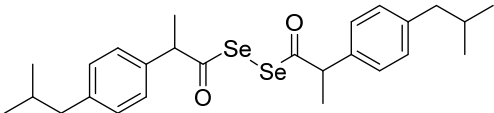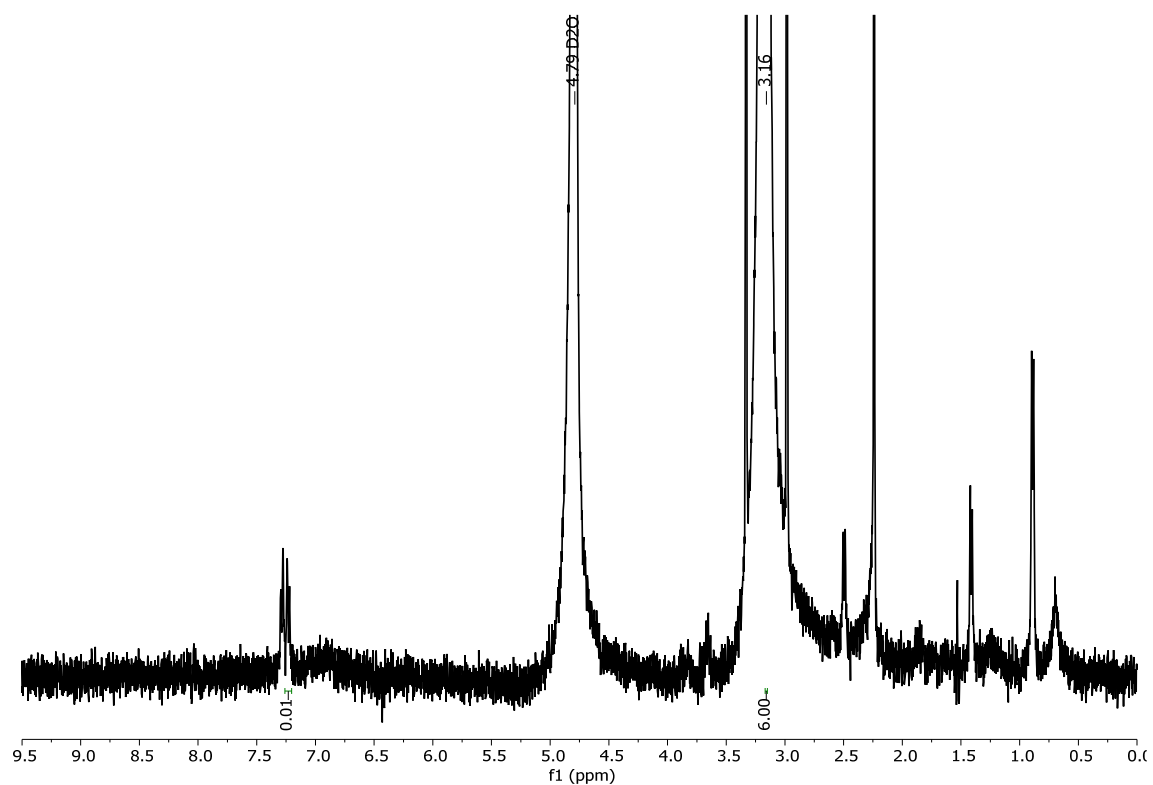

**Figure S38.**  $^1\text{H}$ -NMR spectrum of compound **II.5** and dimethyl sulfone.

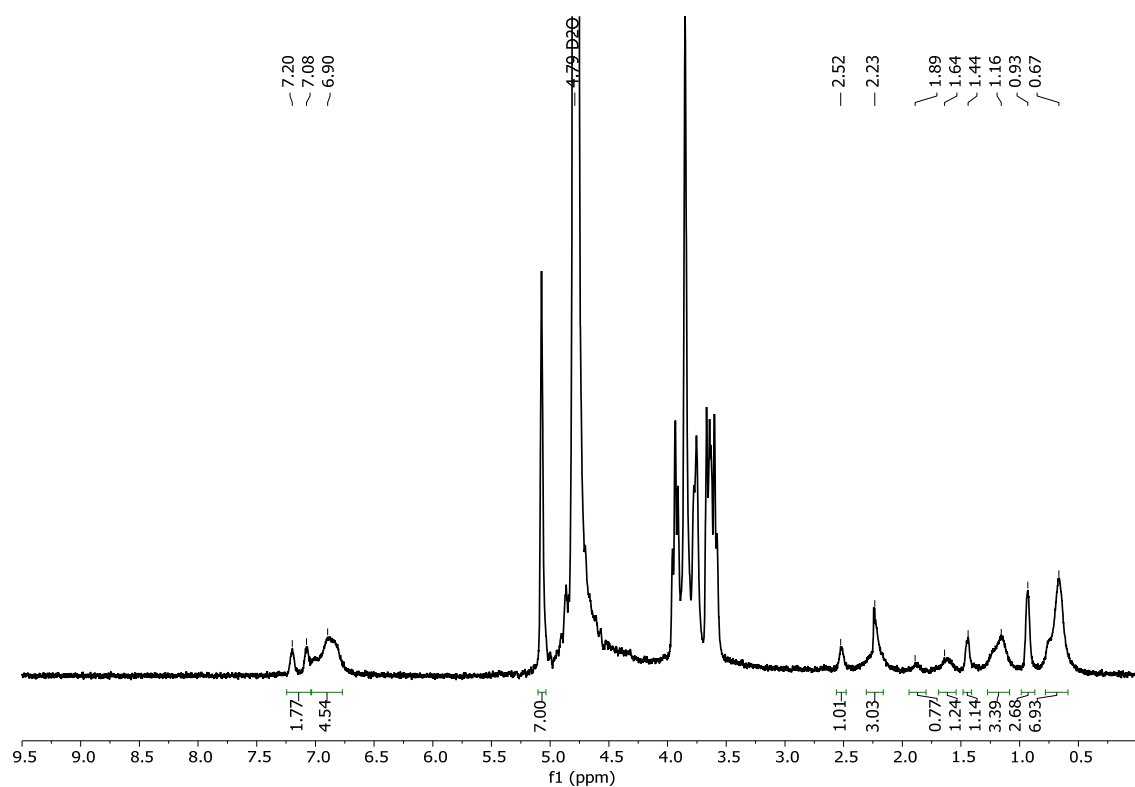

**Figure S39.** <sup>1</sup>H-NMR spectrum of compound II.5 and β-CD.

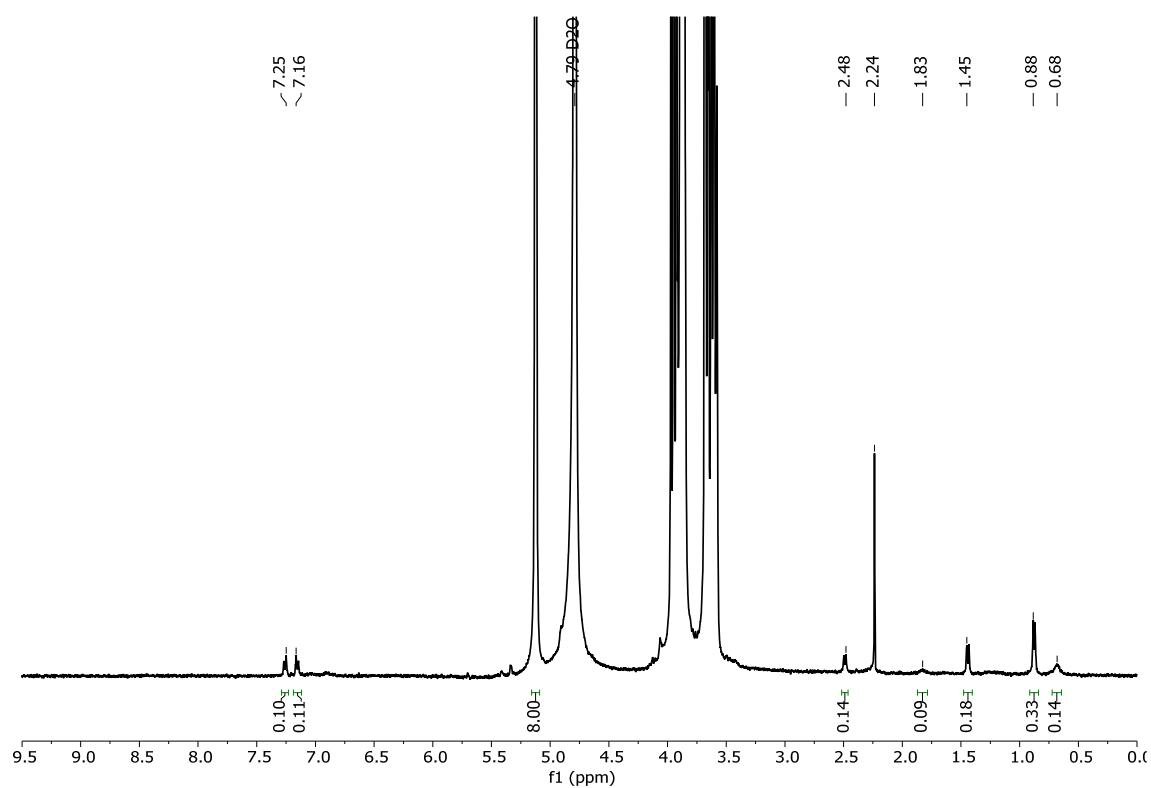

**Figure S40.** <sup>1</sup>H-NMR spectrum of compound II.5 and γ-CD.

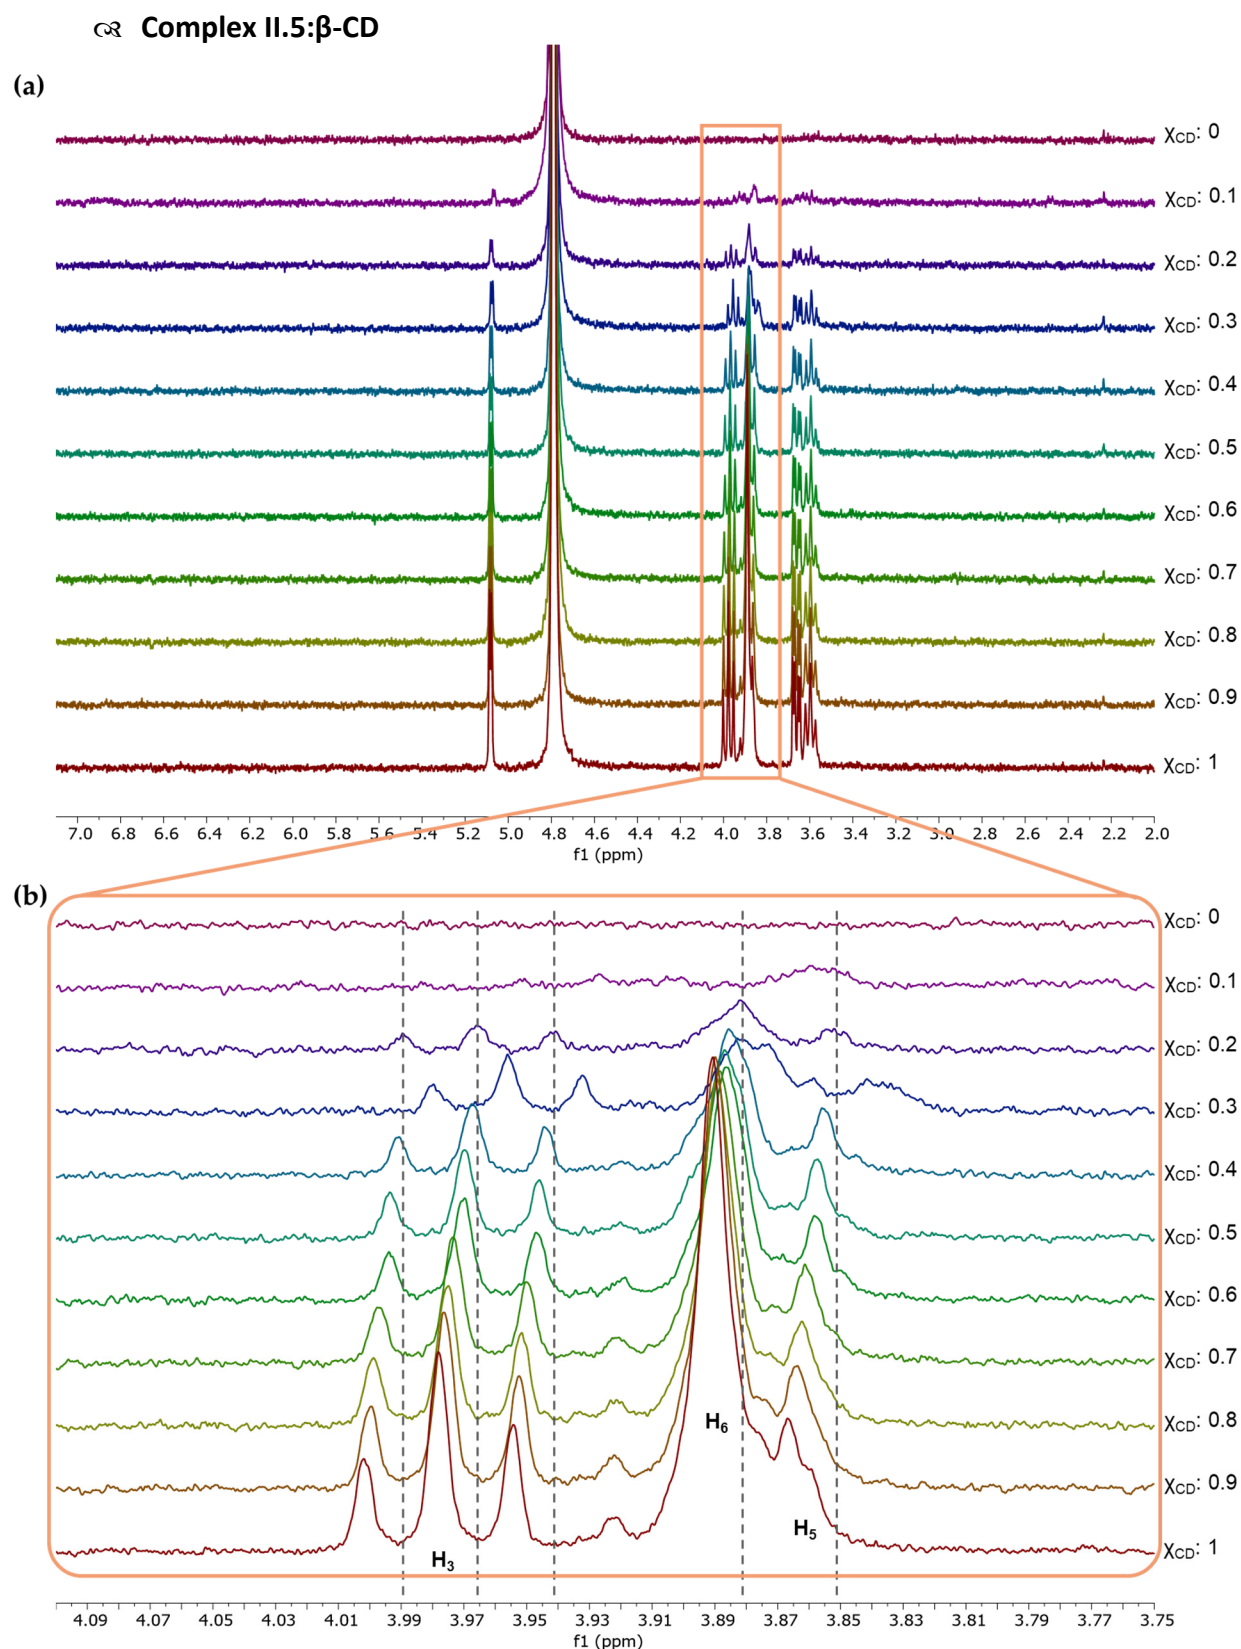

**Figure S41.** (a)  $^1\text{H}$ -NMR spectra for different molar fractions of the complex II.5:β-CD and (b) expansion of the region including protons  $H_3$ ,  $H_5$  and  $H_6$  of the β-CD.

✎ Computational data

**Table S1.** Scores for best poses with  $\beta$ -CD (London GBVI, explicit solvent).

| Ref. | S       | rmsd_refine | E_score1 | E_refine | E_score2 |
|------|---------|-------------|----------|----------|----------|
| I.3e | -5.7072 | 0.9549      | -9.1928  | -28.8446 | -5.7072  |
| I.4a | -6.5707 | 1.3715      | -11.1362 | -35.2667 | -6.5707  |
| I.4b | -6.6023 | 2.5629      | -9.1989  | -37.9295 | -6.6023  |
| I.4d | -6.3956 | 2.1327      | -13.9270 | -32.9405 | -6.3956  |
| I.4e | -6.6008 | 2.0304      | -9.4502  | -36.2130 | -6.6008  |
| II.1 | -6.3968 | 2.1026      | -8.5649  | -30.1874 | -6.3968  |
| II.2 | -7.5321 | 3.3643      | -7.8035  | -42.4309 | -7.5321  |
| II.3 | -6.5140 | 2.3443      | -7.5844  | -39.5321 | -6.5140  |
| II.4 | -6.6059 | 1.4075      | -7.6007  | -41.1813 | -6.6059  |
| II.5 | -6.5295 | 2.3124      | -7.6958  | -37.8857 | -6.5295  |

**Table S2.** Scores for best poses with  $\gamma$ -CD (London GBVI, explicit solvent).

| Ref. | S        | rmsd_refine | E_score1 | E_refine | E_score2 |
|------|----------|-------------|----------|----------|----------|
| I.3e | -8.0412  | 1.9909      | -3.1866  | -33.4640 | -8.0412  |
| I.4a | -9.6127  | 2.2584      | -1.8757  | -34.6887 | -9.6127  |
| I.4b | -8.8817  | 1.9890      | -1.9153  | -32.3470 | -8.8817  |
| I.4d | -8.8520  | 4.6771      | -2.2712  | -35.2892 | -8.8520  |
| I.4e | -9.1430  | 4.9243      | -2.1714  | -36.6787 | -9.1430  |
| II.1 | -8.1714  | 1.2808      | -3.8911  | -35.5261 | -8.1714  |
| II.2 | -10.1487 | 1.6912      | 1.8735   | -42.3182 | -10.1487 |
| II.3 | -8.9557  | 2.0750      | 0.2874   | -38.5811 | -8.9557  |
| II.4 | -9.1211  | 2.6151      | -0.5199  | -42.0503 | -9.1211  |
| II.5 | -7.9440  | 2.0826      | 2.5007   | -34.7207 | -7.9440  |

**Table S3.** Energy values for best poses of selected compounds (London GBVI, explicit solvent).

| Ref. complex        | E all   |
|---------------------|---------|
| $\beta$ -CD         |         |
| I3e_best_solvent    | -257.77 |
| II5_01_best_solvent | -465.87 |
| II5_02_best_solvent | -463.43 |
| $\gamma$ -CD        |         |
| I3e_best_solvent    | -293.76 |
| II5_01_best_solvent | -508.33 |
| II5_02_best_solvent | -507.18 |
